# Supplementary material for: Stable water isotopes and tritium tracers tell the same tale: no evidence for underestimation of catchment transit times inferred by stable isotopes in StorAge Selection (SAS)-function models
Source: Copernicus journal article supplement (doi:10.5194/hess-27-3083-2023), 2023-08-24
Supplement: Supplementary file 1 [file hess-27-3083-2023-supplement.pdf]

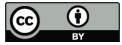

*Supplement of*

## **Stable water isotopes and tritium tracers tell the same tale: no evidence for underestimation of catchment transit times inferred by stable isotopes in StorAge Selection (SAS)-function models**

**Siyuan Wang et al.**

*Correspondence to:* Siyuan Wang (s.wang-9@tudelft.nl)

The copyright of individual parts of the supplement might differ from the article licence.

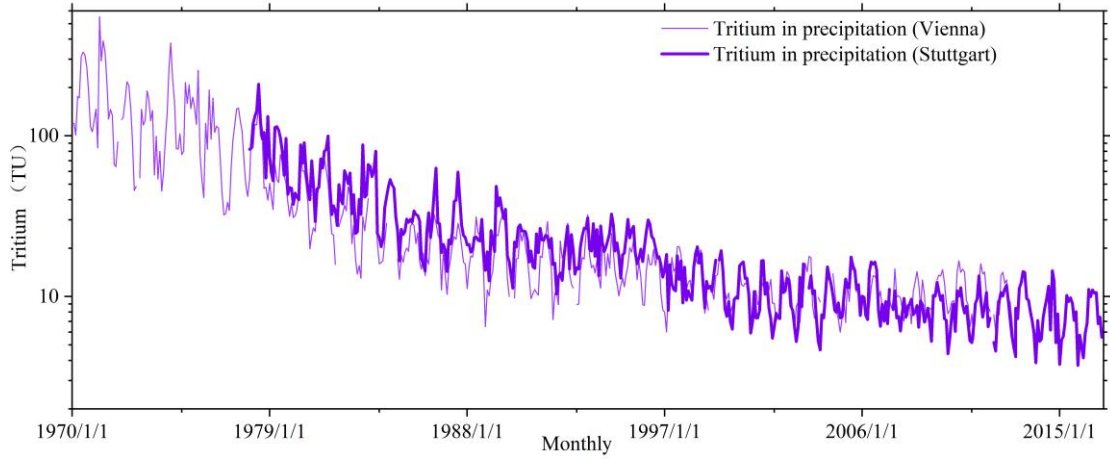

**Figure S1.** Long term  $^3\text{H}$  data in precipitation at Vienna station and Stuttgart (thin violet line for Vienna station and dark violet line for Stuttgart station).

We estimated the sine wave parameters  $a_p$ ,  $b_p$  and  $\varphi_p$  in each of the four precipitation zones (P1 – P4) based on the multiple regression coefficients reported by Allan et al. (2018) in which the study area is very closed to our catchment as follows:

$$a_p = (-7.90 * 10^{-6}) * La_p + (-2.62 * 10^{-6}) * Lo_p + 0.0006 * H_p + 0.28 * Tr_p - 0.009 * P_p - 0.43 \quad (\text{S1})$$

$$\varphi_p = (-6.29 * 10^{-7}) * La_p + 1.82 \quad (\text{S2})$$

$$b_p = (3.45 * 10^{-6}) * La_p + (1.19 * 10^{-6}) * Lo_p - 0.002 * H_p - 0.18 * Tr_p - 5.83 \quad (\text{S3})$$

With  $La_p$  [°] latitude,  $Lo_p$  [°] longitude,  $H_p$  [m] elevation,  $Tr_p$  [°C] mean annual range of monthly temperatures, and  $P_p$  [cm] mean annual precipitation. Note that all of the above individual spatial predictor variables, averaged for each precipitation zone (P1 – P4) (Table S1).

**Table S1** The sine parameters' predictor variables in different precipitation zones in the Neckar river basin.

| Precipitation zone | $La_p$ [°] | $Lo_p$ [°] | $H_p$ [m] | $Tr_p$ [°C] | $P_p$ [cm] |
|--------------------|------------|------------|-----------|-------------|------------|
| P1                 | 48.42      | 8.87       | 568.04    | 19.90       | 93.28      |
| P2                 | 48.92      | 9.12       | 322.20    | 20.05       | 80.87      |
| P3                 | 49.05      | 9.71       | 420.53    | 20.09       | 88.97      |
| P4                 | 48.56      | 8.52       | 673.21    | 19.76       | 105.27     |
| Stuttgart station  | 48.83      | 9.20       | 314.00    | 20.04       | 69.08      |

**Table S2** The estimates of sine parameters for different precipitation zones and Stuttgart station.

|           | $a_p$ [‰] | $\varphi_p$ [rad] | $b_p$ [‰] |
|-----------|-----------|-------------------|-----------|
| P1        | 4.64      | 1.82              | -10.55    |
| P2        | 4.65      | 1.82              | -10.08    |
| P3        | 4.65      | 1.82              | -10.29    |
| P4        | 4.56      | 1.82              | -10.73    |
| Stuttgart | 4.75      | 1.82              | -10.06    |

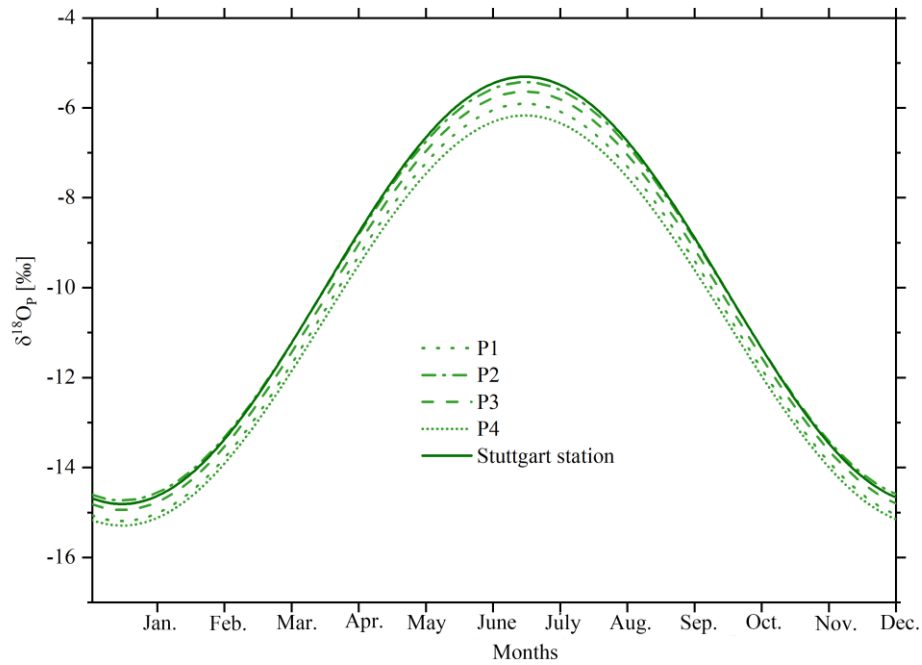

Figure S2. The  $\delta^{18}\text{O}_p$  sine wave for precipitation zones (P1 – P4) and Stuttgart station.

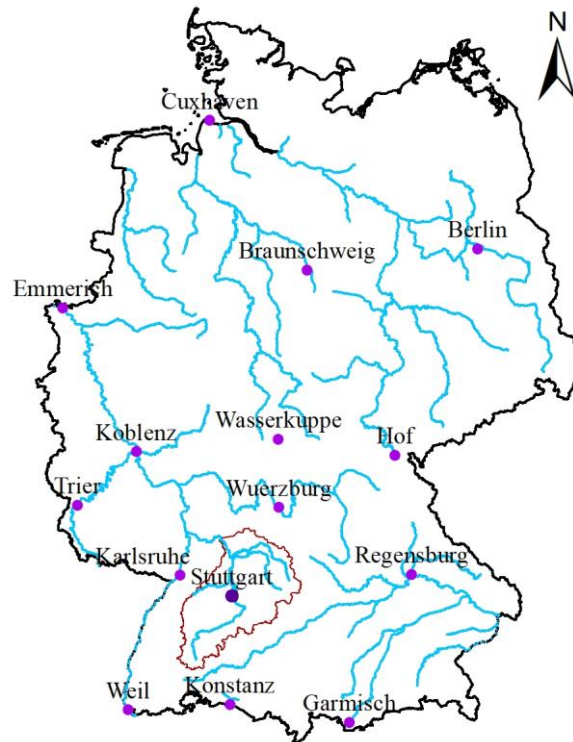

Figure S3.  $^3\text{H}$  concentrations in precipitation observed at 15 multiple locations across Germany.

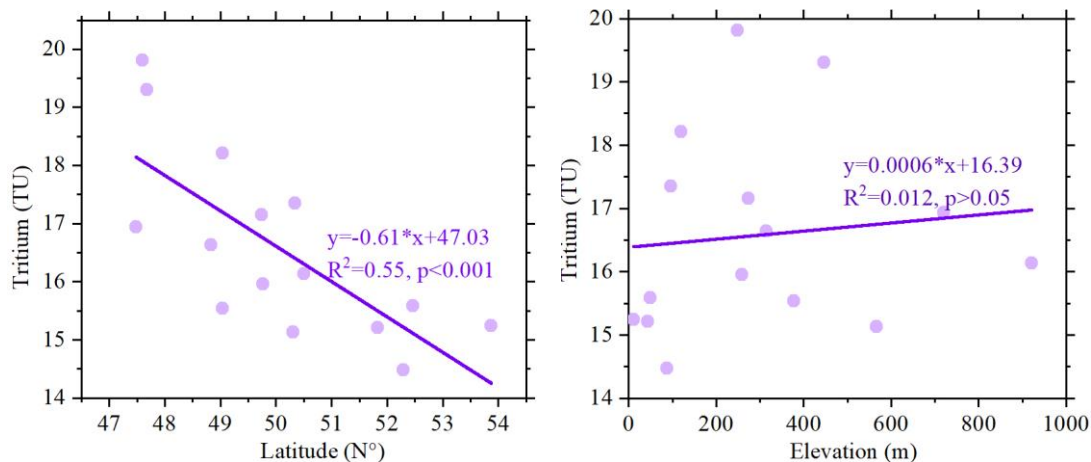

**Figure S4.** The linear regression relationships between  $^3\text{H}$  concentrations in precipitation observed at 15 locations across Germany with latitude and elevation respectively.

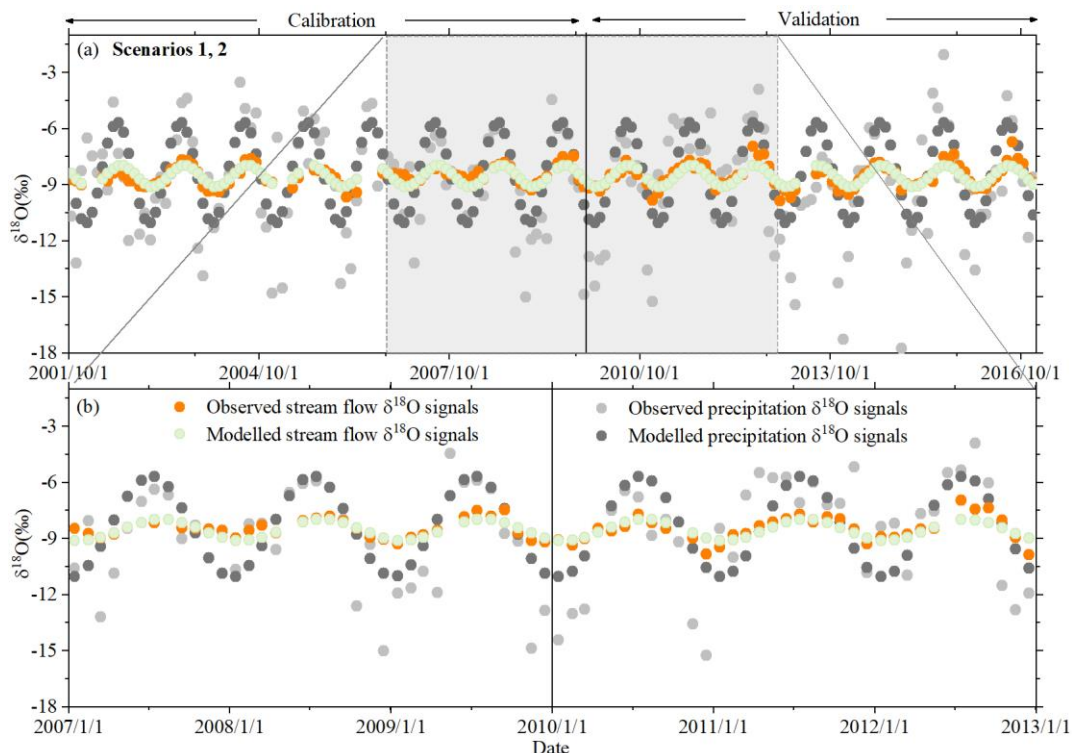

**Figure S5.** The time series of stream  $\delta^{18}\text{O}$  reproduced by SW models, i.e., calibration strategy  $C_x$  (scenario 1, 2), for the model calibration and evaluation periods. (a) Observed  $\delta^{18}\text{O}$  signals in precipitation (light grey dots) and modelled  $\delta^{18}\text{O}$  signals in precipitation (dark grey dots), and observed stream  $\delta^{18}\text{O}$  signals (orange dots) as well as modelled stream  $\delta^{18}\text{O}$  signals (light green dots), (b) zoom-in of observed and modelled  $\delta^{18}\text{O}$  signals for the 01/01/2007 – 31/12/2012 period.

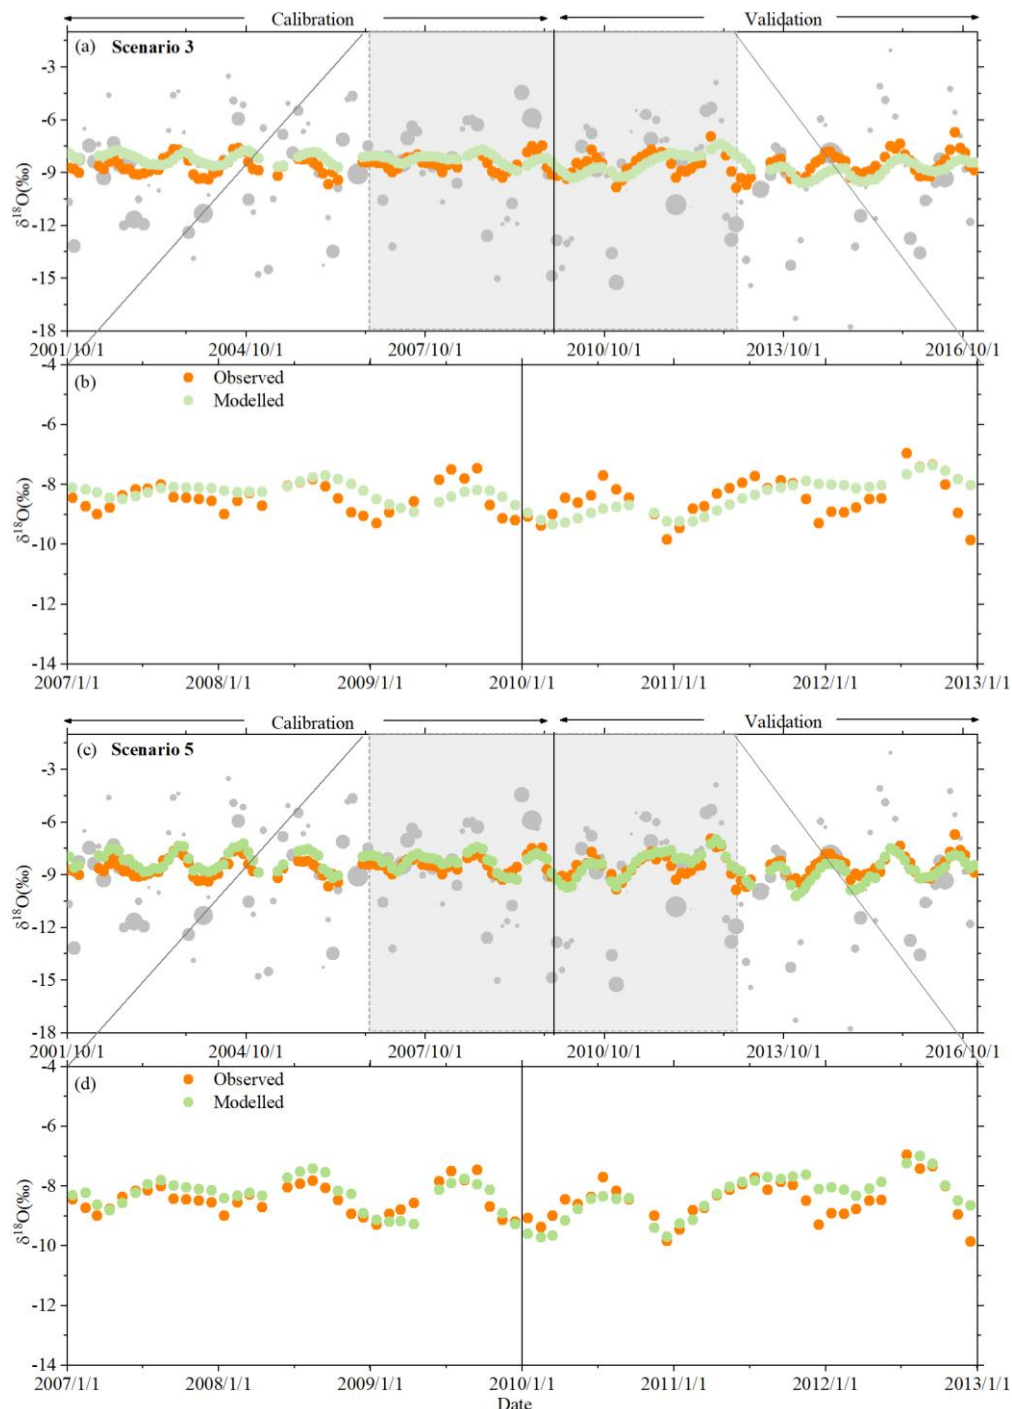

**Figure S6.** The time series of stream  $\delta^{18}\text{O}$  reproduced by CO models, i.e., calibration strategy  $C_{\delta^{18}\text{O}}$  (scenario3, 5), for the model calibration and evaluation periods. (a) Observed  $\delta^{18}\text{O}$  signals in precipitation (light grey dots; size of dots indicates the precipitation volume) and observed stream  $\delta^{18}\text{O}$  signals (orange dots) as well as the modelled stream  $\delta^{18}\text{O}$  signals (light green dots) for scenarios 3, (b) zoom-in of observed and modelled  $\delta^{18}\text{O}$  signals in the stream for the 01/01/2007 – 31/12/2012 period for scenarios 3, (c) Observed  $\delta^{18}\text{O}$  signals in precipitation and in stream same as (a), and the modelled stream  $\delta^{18}\text{O}$  signals (relatively darker green dots) for scenarios 5, (d) zoom-in of observed and modelled  $\delta^{18}\text{O}$  signals in the stream for the 01/01/2007 – 31/12/2012 period for scenarios 5.

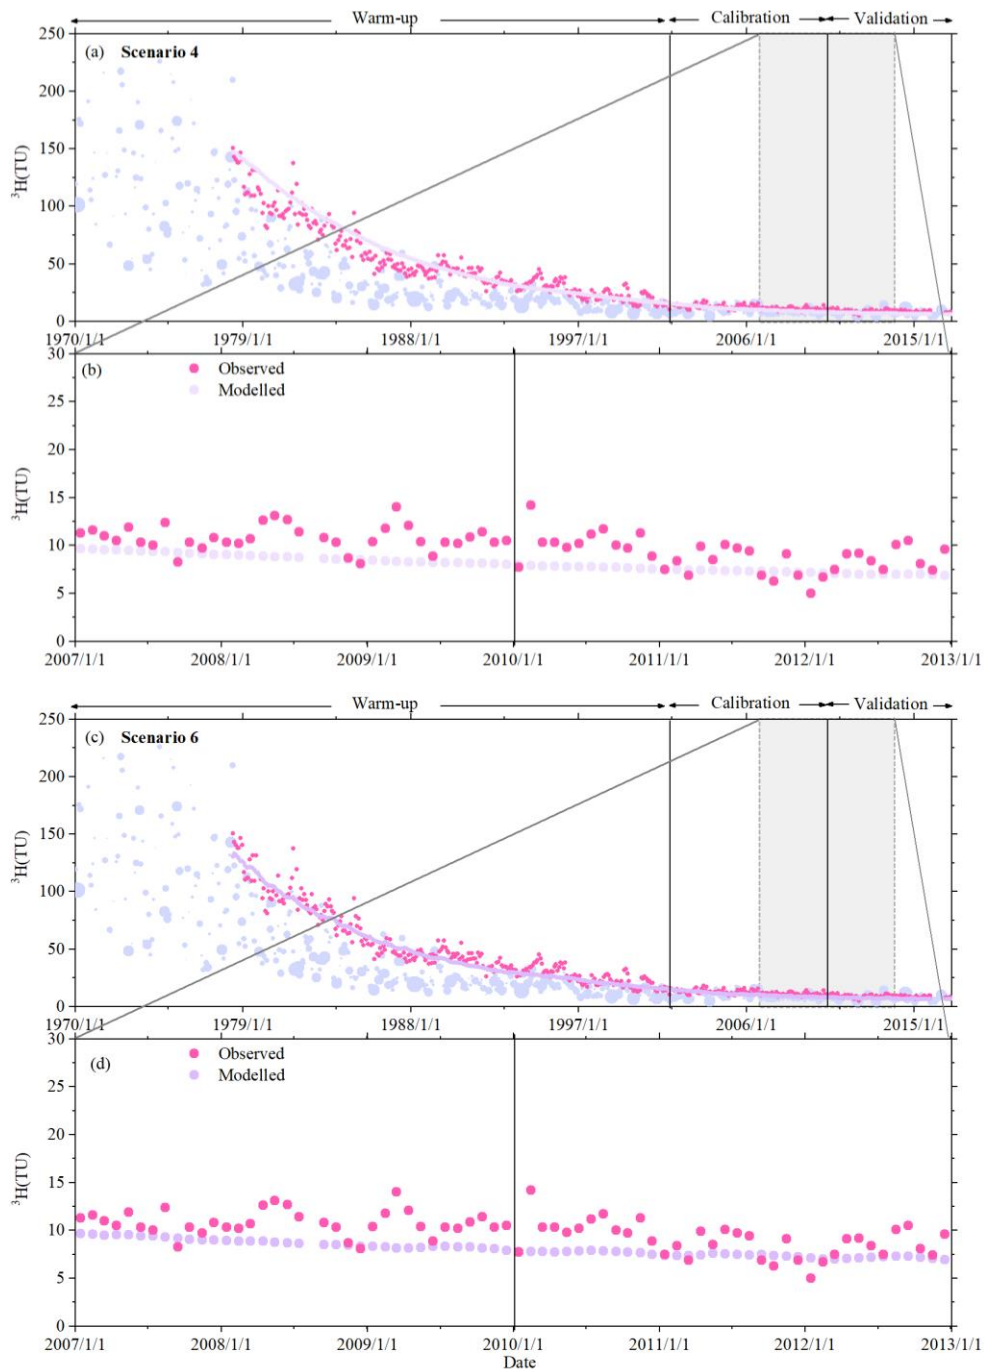

**Figure S7.** Time series of stream  $^3\text{H}$  reproduced by CO models, i.e., calibration strategy  $C^3\text{H}$ (scenario4, 6), for the model calibration and evaluation periods. (a) Observed  $^3\text{H}$  signals in precipitation (light blue-purple dots; size of dots indicates associated precipitation volume) and in streamflow (pink dots) as well as the modelled  $^3\text{H}$  stream signal (light purple dots), (b) zoom-in of observed and modelled  $^3\text{H}$  signals for the 01/01/2007 – 31/12/2012 period for scenarios 4, (c) Observed  $^3\text{H}$  signals in precipitation and in stream same as (a), and the modelled stream  $^3\text{H}$  signals (relatively darker purple dots) for scenarios 6, (d) zoom-in of observed and modelled  $^3\text{H}$  signals in the stream for the 01/01/2007 – 31/12/2012 period for scenarios 6.

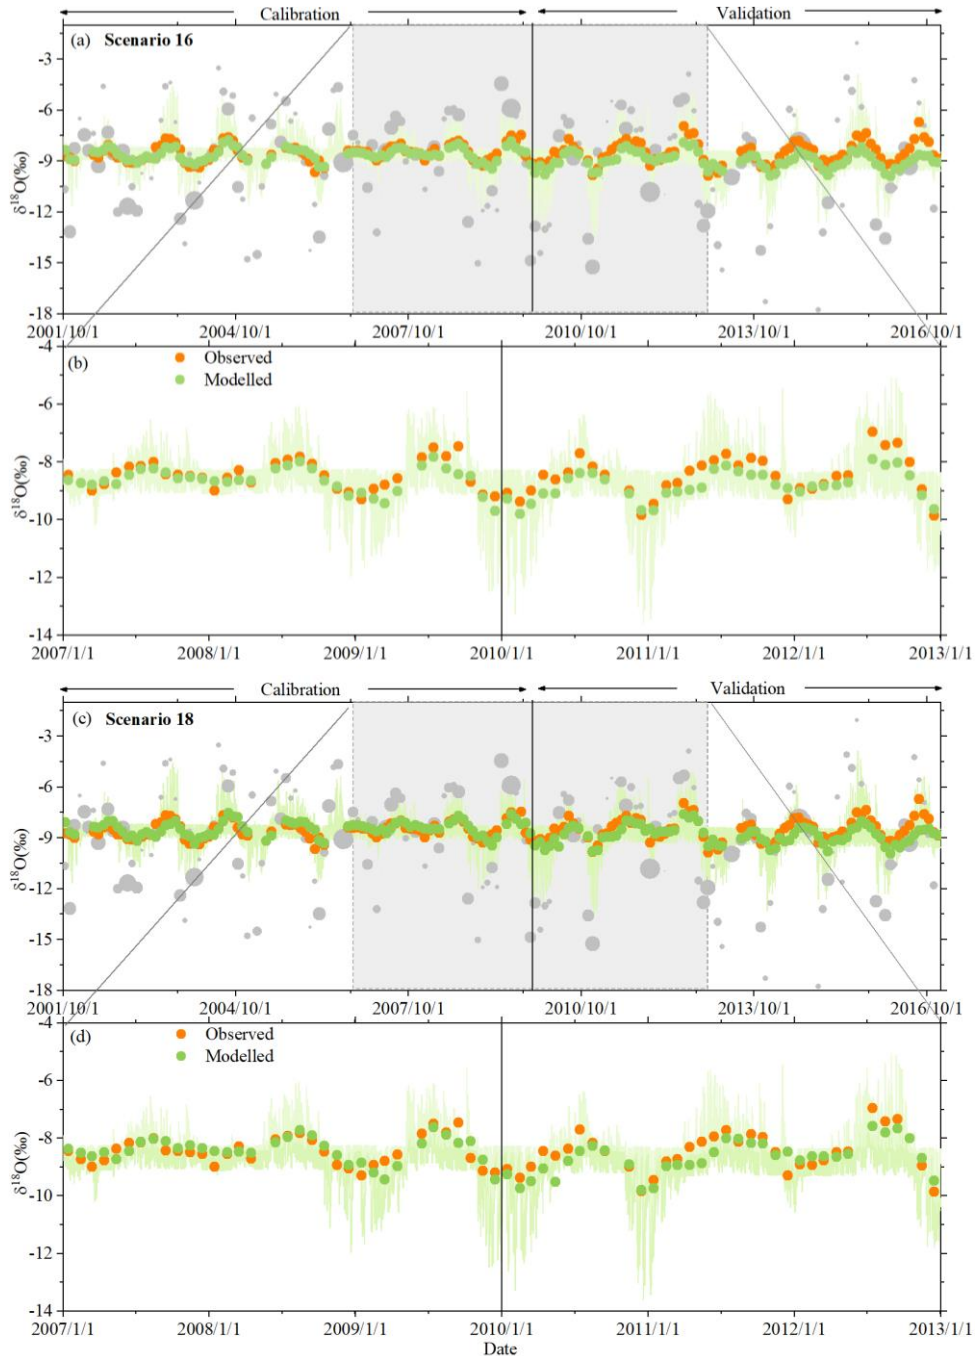

**Figure S8.** The time series of stream  $\delta^{18}\text{O}$  reproduced by IM-SAS-L models based on simultaneous calibration to  $\delta^{18}\text{O}$  and the streamflow signatures, i.e., calibration strategy  $C_{\delta^{18}\text{O}, \text{Q}}$  (scenario 16) and  $C_{\delta^{18}\text{O}, \text{H}_2\text{O}}$  (scenario 18), for the model calibration and evaluation periods. (a) Observed  $\delta^{18}\text{O}$  signals in precipitation (light grey dots; size of dots indicates the precipitation volume) and observed stream  $\delta^{18}\text{O}$  signals (orange dots) as well as the modelled stream  $\delta^{18}\text{O}$  signals (green dots) and the 5<sup>th</sup>/95<sup>th</sup> percentile of all retained Pareto optimal solutions obtained from calibration strategy  $C_{\delta^{18}\text{O}, \text{Q}}$  (light green shaded area) for scenarios 16, (b) zoom-in of observed and modelled  $\delta^{18}\text{O}$  signals in the stream for the 01/01/2007 – 31/12/2012 period for scenarios 16, (c) Observed  $\delta^{18}\text{O}$  signals in

precipitation and in stream same as (a), and the modelled stream  $\delta^{18}\text{O}$  signals (relatively darker green dots) with the 5<sup>th</sup>/95<sup>th</sup> percentile of all retained pareto optimal solutions obtained from calibration strategy  $C_{\delta^{18}\text{O}, \text{H}, \text{Q}}$  (light green shaded area) for scenarios 18, (d) zoom-in of observed and modelled  $\delta^{18}\text{O}$  signals in the stream for the 01/01/2007 – 31/12/2012 period for scenarios 18.

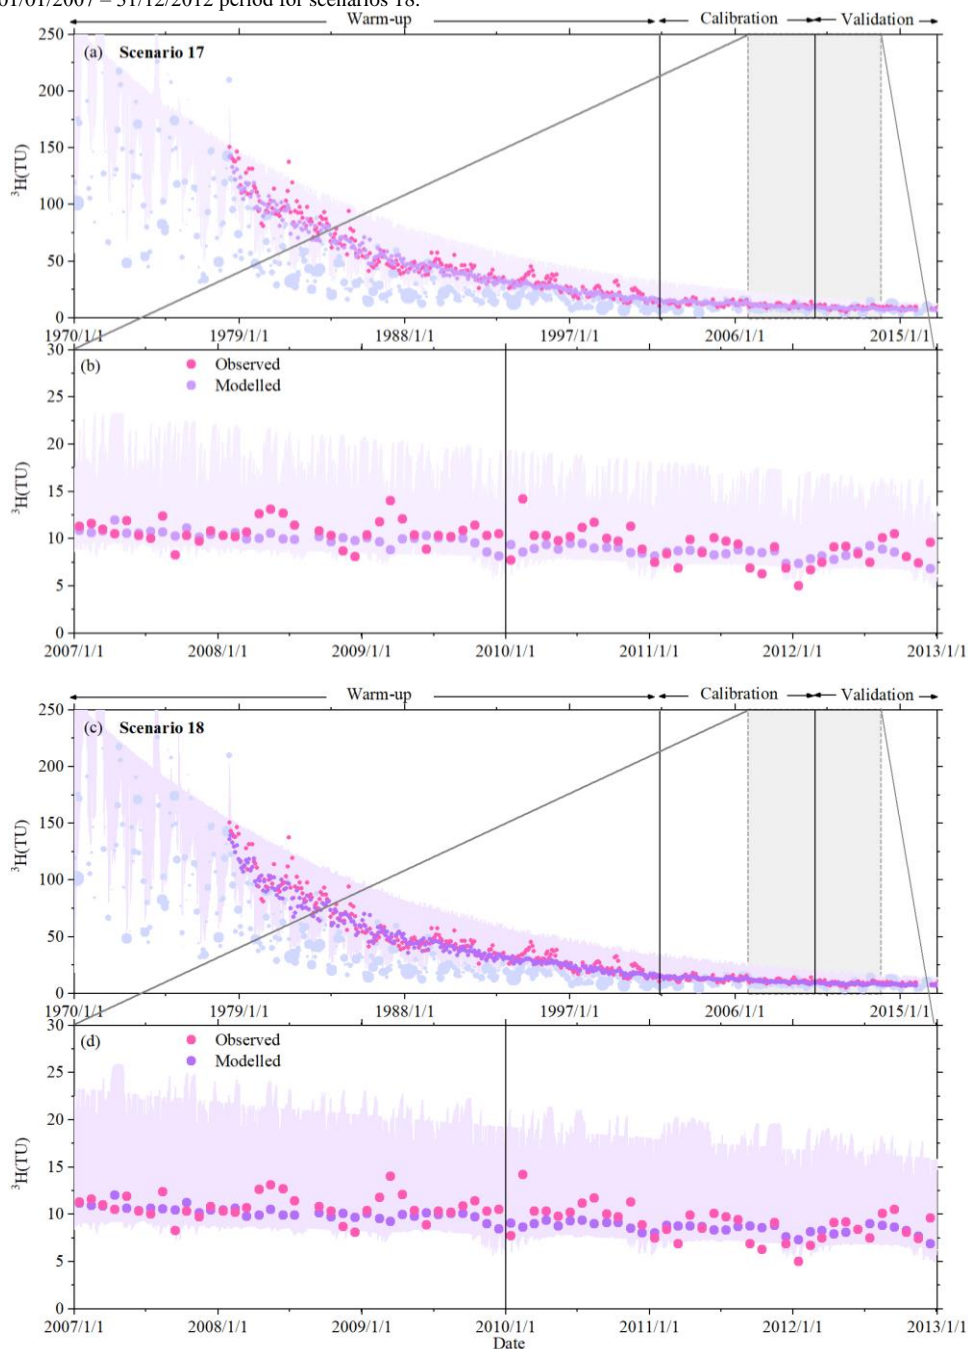

**Figure S9.** Time series of stream  $^3\text{H}$  reproduced by model IM-SAS-L based on simultaneous calibration to tracer and the streamflow signatures, i.e. calibration strategy  $C_{\text{H}, \text{Q}}$  (scenario 17) and  $C_{\delta^{18}\text{O}, \text{H}, \text{Q}}$  (scenario 18), for the model calibration and evaluation periods. (a) Observed  $^3\text{H}$  signals in precipitation (light blue-purple dots; size of dots indicates associated precipitation volume) and in streamflow (pink dots) as well as the modelled  $^3\text{H}$  stream signal based on the most balanced solution, i.e. lowest DE (light purple dots), and the 5<sup>th</sup>/95<sup>th</sup> inter-quantile range of all retained pareto optimal solutions obtained from calibration strategy  $C_{\text{H}, \text{Q}}$  (light purple shaded area) for scenario 17, (b) zoom-in of observed and modelled  $^3\text{H}$  signals for the 01/01/2007 – 31/12/2012 period for scenario



17, (c) Observed  $^3\text{H}$  signals in precipitation and in stream same as (a), and the modelled stream  $^3\text{H}$  signals (relatively darker purple dots) and the 5<sup>th</sup>/95<sup>th</sup> percentile of all retained pareto optimal solutions obtained from calibration strategy  $C_{\delta^{18}\text{O},^3\text{H},Q}$  (light purple shaded area) for scenarios 18, (d) zoom-in of observed and modelled  $^3\text{H}$  signals in the stream for the 01/01/2007 – 31/12/2012 period for scenarios 18.

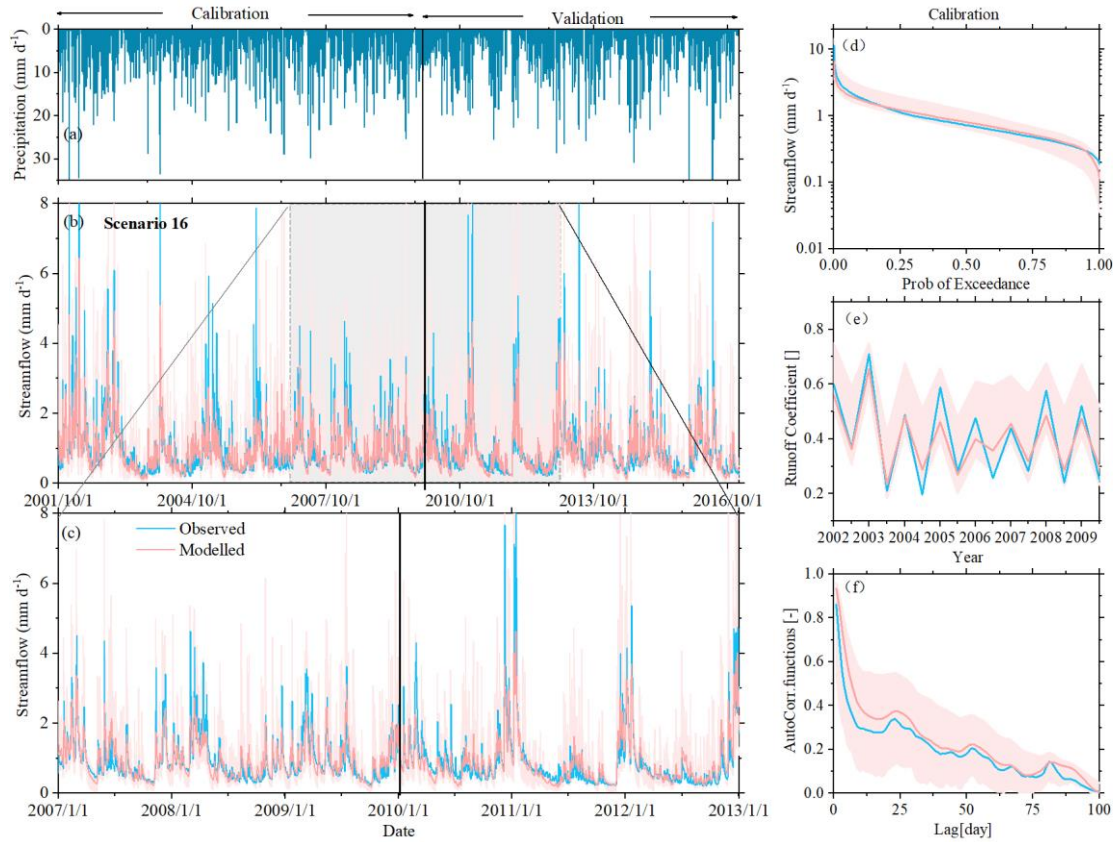

**Figure S10.** Hydrograph and selected hydrological signatures reproduced by IM-SAS-L, following a simultaneous calibration to the hydrological response and  $\delta^{18}\text{O}$  ( $C_{\delta^{18}\text{O},Q}$ ; scenario 16). (a) Time series of observed daily precipitation; observed and modelled (b) daily stream flow ( $Q$ ), where the light red line indicates the most balanced solution, i.e., lowest  $D_E$ , and the light red shaded area the 5<sup>th</sup>/95<sup>th</sup> inter-quantile range obtained from all pareto optimal solutions; (c) stream flow zoomed-in to the 01/01/2007 – 31/12/2012 period; (d) flow duration curves (FDC), (e) seasonal runoff coefficients ( $RC_Q$ ) and (f) autocorrelation functions of stream flow ( $AC_Q$ ) for the calibration period. Blue lines indicate values based on observed streamflow ( $Q_o$ ), light red lines are values based on modelled stream flow ( $Q_m$ ) representing the most balanced solutions, i.e., lowest  $D_E$  and the light red shaded areas show the 5<sup>th</sup>/95<sup>th</sup> inter-quantile ranges obtained from all pareto optimal solutions.

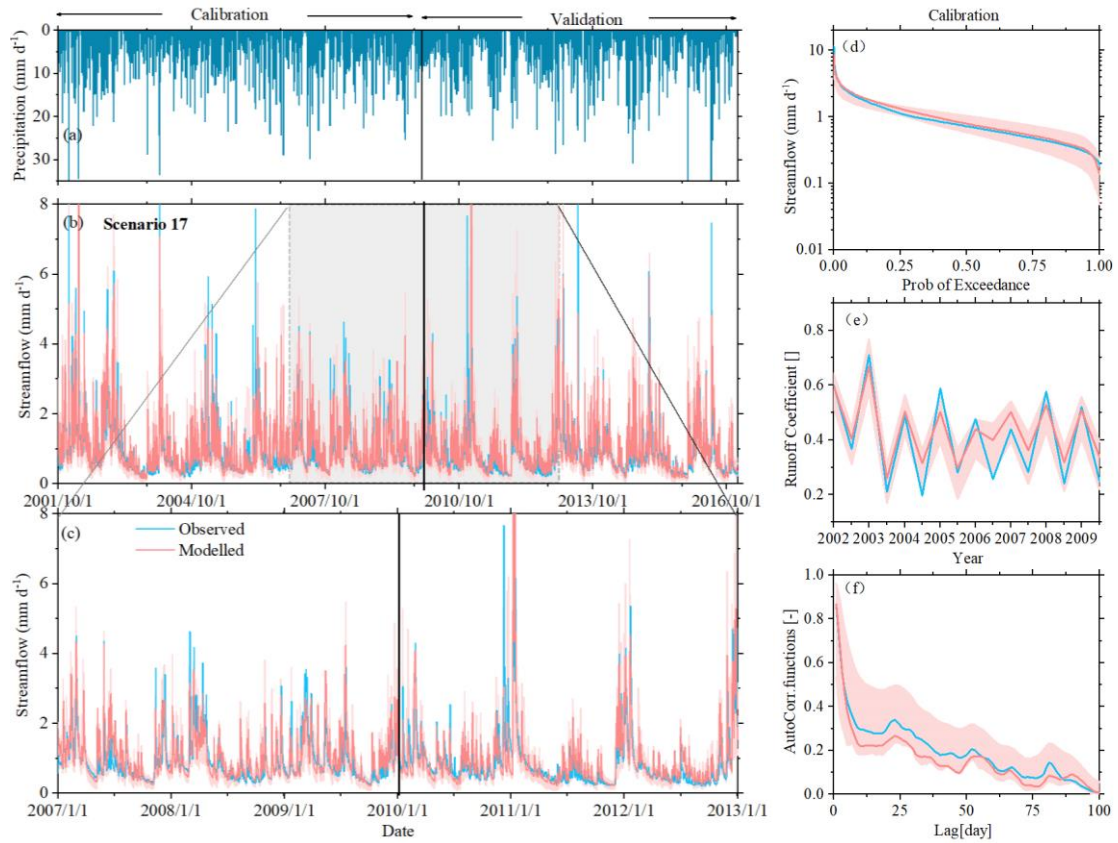

**Figure S11.** Hydrograph and selected hydrological signatures reproduced by IM-SAS-L, following a simultaneous calibration to the hydrological response and  $^3\text{H}$  ( $C_{\text{H},Q}^3$ ; scenario 17). (a) Time series of observed daily precipitation; observed and modelled (b) daily stream flow ( $Q$ ), where the light red line indicates the most balanced solution, i.e., lowest  $D_E$ , and the light red shaded area the 5<sup>th</sup>/95<sup>th</sup> inter-quantile range obtained from all pareto optimal solutions; (c) stream flow zoomed-in to the 01/01/2007 – 31/12/2012 period; (d) flow duration curves (FDC), (e) seasonal runoff coefficients ( $RC_Q$ ) and (f) autocorrelation functions of stream flow ( $AC_Q$ ) for the calibration period. Blue lines indicate values based on observed streamflow ( $Q_o$ ), light red lines are values based on modelled stream flow ( $Q_m$ ) representing the most balanced solutions, i.e., lowest  $D_E$  and the light red shaded areas show the 5<sup>th</sup>/95<sup>th</sup> inter-quantile ranges obtained from all pareto optimal solutions.

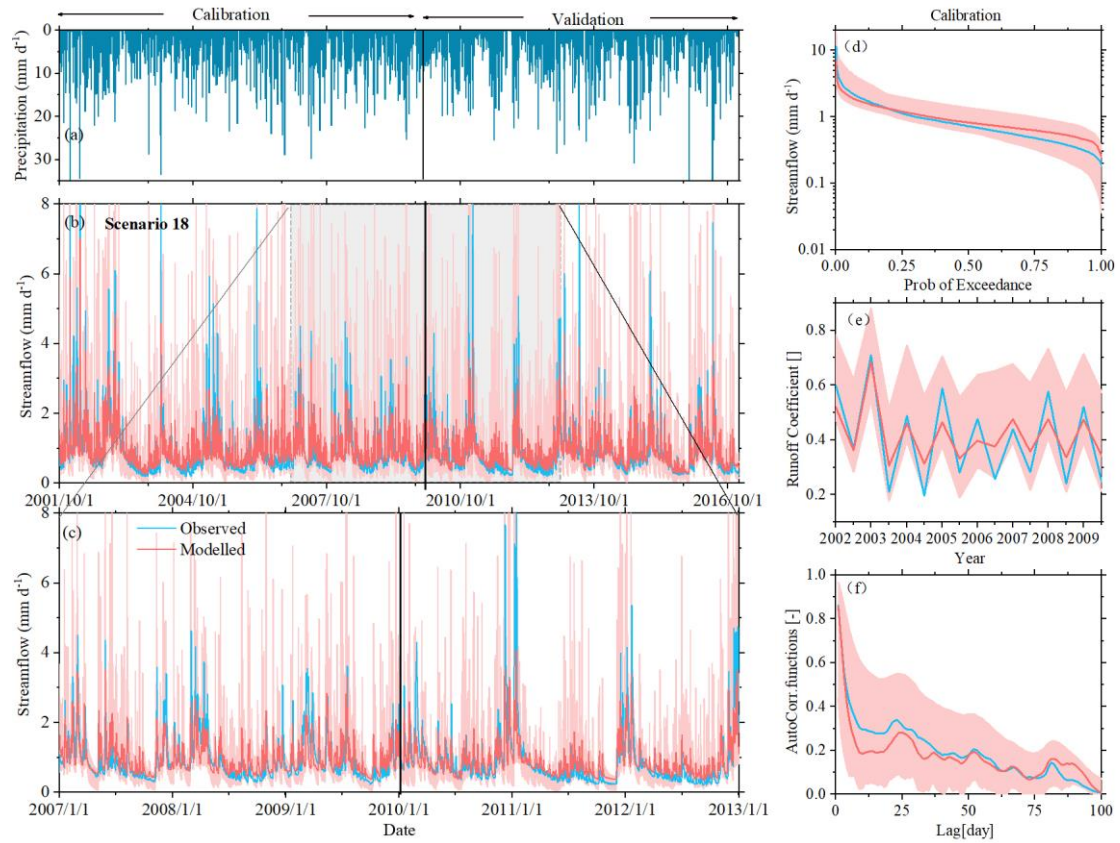

**Figure S12.** Hydrograph and selected hydrological signatures reproduced by IM-SAS-L, following a simultaneous calibration to the hydrological response,  $\delta^{18}\text{O}$  and  $^3\text{H}$  ( $\text{C}_{\delta^{18}\text{O},^3\text{H}_\text{Q}}$ ; scenario 18). (a) Time series of observed daily precipitation; observed and modelled (b) daily stream flow ( $Q$ ), where the light red line indicates the most balanced solution, i.e., lowest  $D_E$ , and the light red shaded area the 5<sup>th</sup>/95<sup>th</sup> inter-quantile range obtained from all pareto optimal solutions; (c) stream flow zoomed-in to the 01/01/2007 – 31/12/2012 period; (d) flow duration curves (FDC), (e) seasonal runoff coefficients ( $\text{RC}_Q$ ) and (f) autocorrelation functions of stream flow ( $\text{AC}_Q$ ) for the calibration period. Blue lines indicate values based on observed streamflow ( $Q_o$ ), light red lines are values based on modelled stream flow ( $Q_m$ ) representing the most balanced solutions, i.e., lowest  $D_E$  and the light red shaded areas show the 5<sup>th</sup>/95<sup>th</sup> inter-quantile ranges obtained from all pareto optimal solutions.

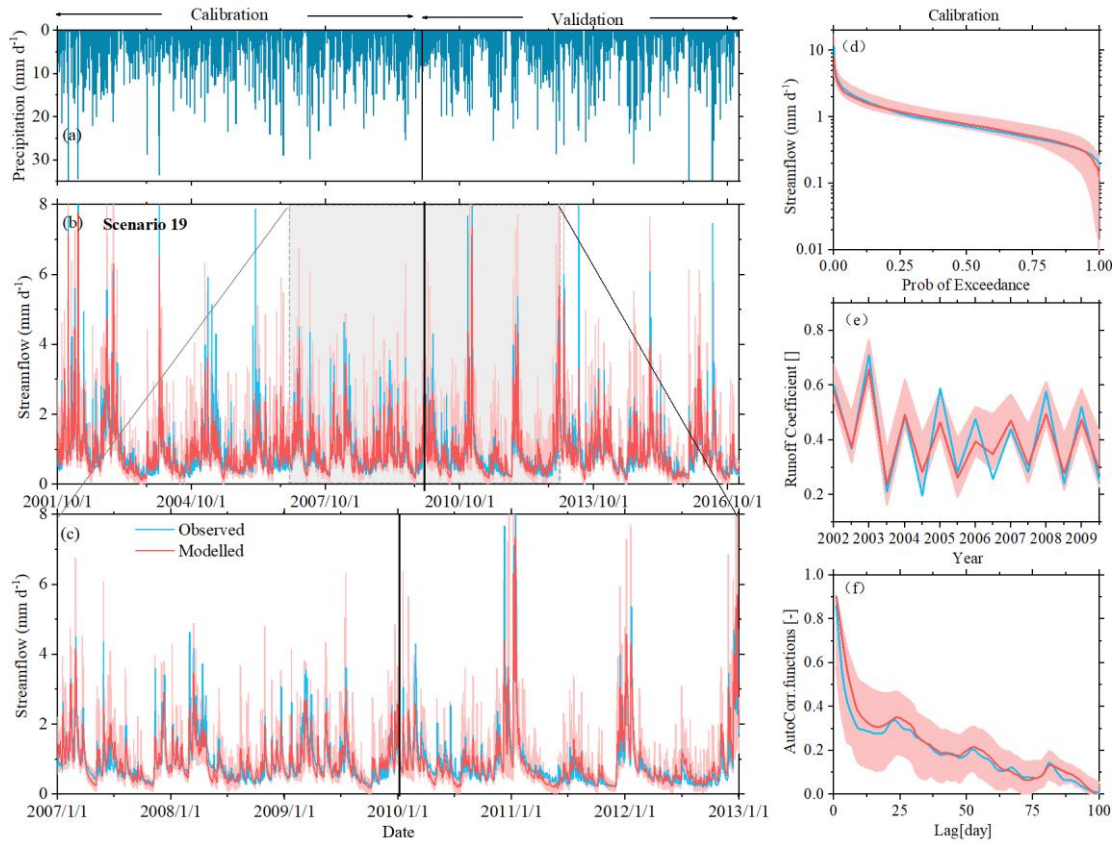

**Figure S13.** Hydrograph and selected hydrological signatures reproduced by IM-SAS-D, following a simultaneous calibration to the hydrological response and  $\delta^{18}\text{O}$  ( $C_{\delta^{18}\text{O},Q}$ ; scenario 19). (a) Time series of observed daily precipitation; observed and modelled (b) daily stream flow ( $Q$ ), where the light red line indicates the most balanced solution, i.e., lowest  $D_E$ , and the light red shaded area the 5<sup>th</sup>/95<sup>th</sup> inter-quantile range obtained from all pareto optimal solutions; (c) stream flow zoomed-in to the 01/01/2007 – 31/12/2012 period; (d) flow duration curves (FDC), (e) seasonal runoff coefficients ( $RC_Q$ ) and (f) autocorrelation functions of stream flow ( $AC_Q$ ) for the calibration period. Blue lines indicate values based on observed streamflow ( $Q_o$ ), light red lines are values based on modelled stream flow ( $Q_m$ ) representing the most balanced solutions, i.e., lowest  $D_E$  and the light red shaded areas show the 5<sup>th</sup>/95<sup>th</sup> inter-quantile ranges obtained from all pareto optimal solutions.

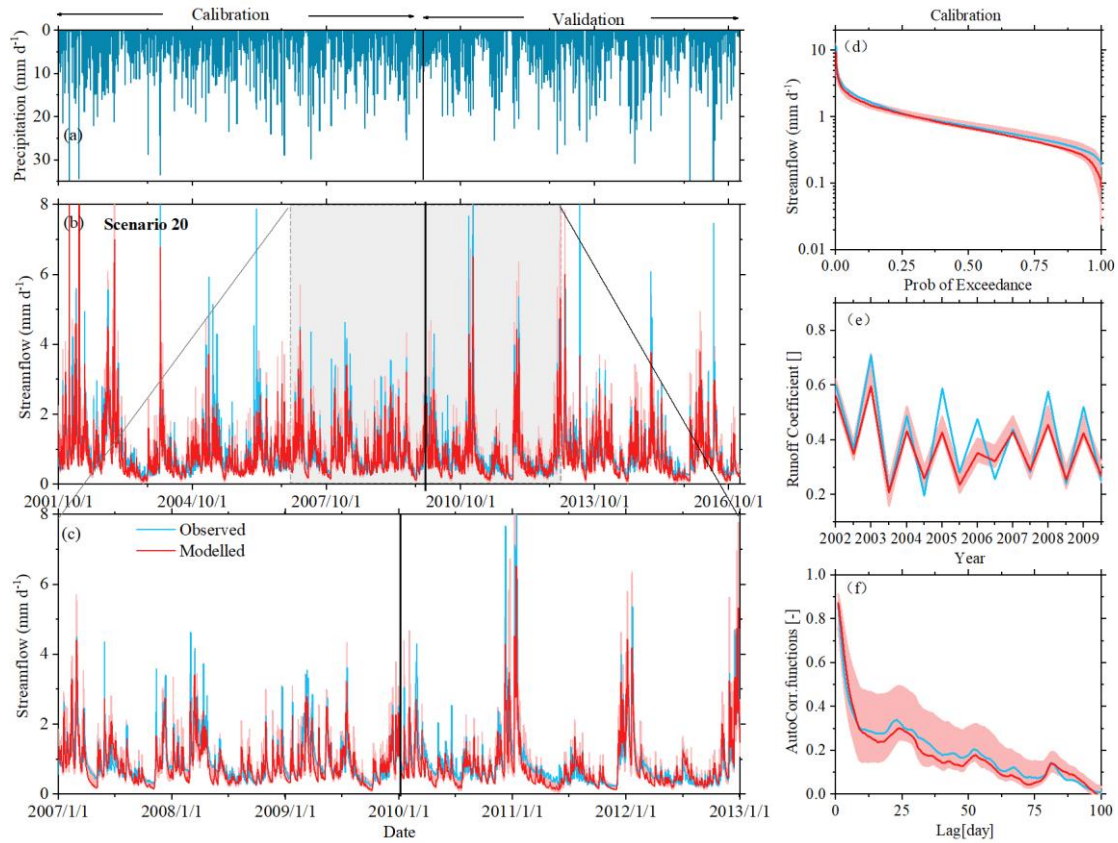

**Figure S14.** Hydrograph and selected hydrological signatures reproduced by IM-SAS-D, following a simultaneous calibration to the hydrological response and  $^3\text{H}$  ( $C_{\text{H},Q}$ ; scenario 20). (a) Time series of observed daily precipitation; observed and modelled (b) daily stream flow ( $Q$ ), where the red line indicates the most balanced solution, i.e., lowest  $D_E$ , and the light red shaded area the 5<sup>th</sup>/95<sup>th</sup> inter-quantile range obtained from all Pareto optimal solutions; (c) stream flow zoomed-in to the 01/01/2007 – 31/12/2012 period; (d) flow duration curves (FDC), (e) seasonal runoff coefficients ( $RC_Q$ ) and (f) autocorrelation functions of stream flow ( $AC_Q$ ) for the calibration period. Blue lines indicate values based on observed streamflow ( $Q_o$ ), red lines are values based on modelled streamflow ( $Q_m$ ) representing the most balanced solutions, i.e., lowest  $D_E$  and the light red shaded areas show the 5<sup>th</sup>/95<sup>th</sup> inter-quantile ranges obtained from all Pareto optimal solutions.

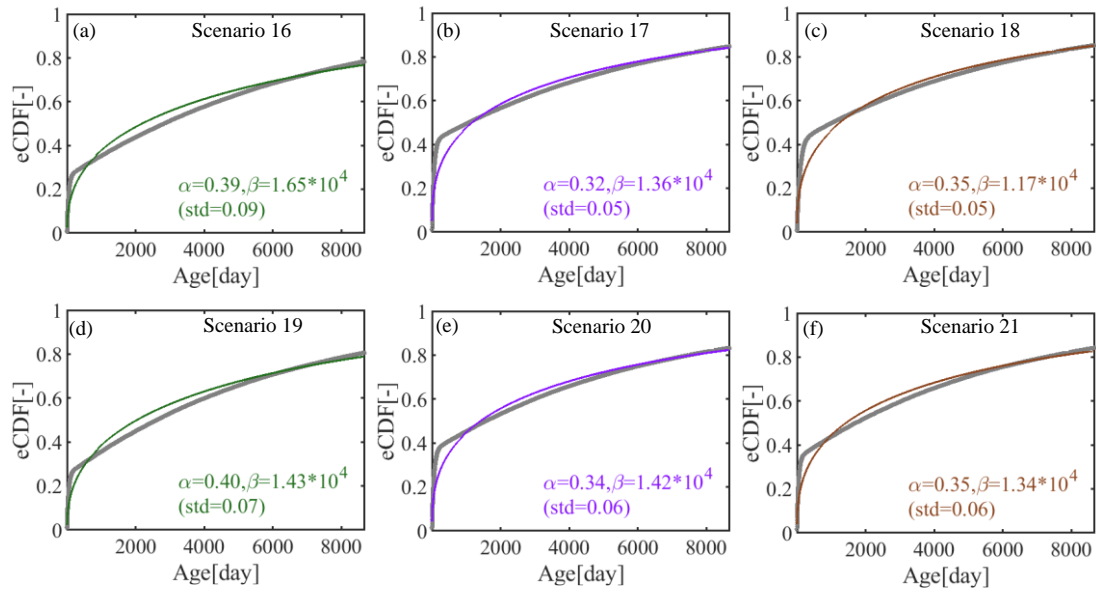

**Figure S15.** The Gamma distributions to the volume-weighted mean steam flow TTDs of model IM-SAS (i.e., scenarios 16-21) based on model IM-SAS-L in (a)-(c) and model IM-SAS-D in (d)-(f). Grey shades in (a)-(f) indicate volume-weighted mean TTDs and colored shades indicate the corresponding fitting Gamma distributions, respectively.

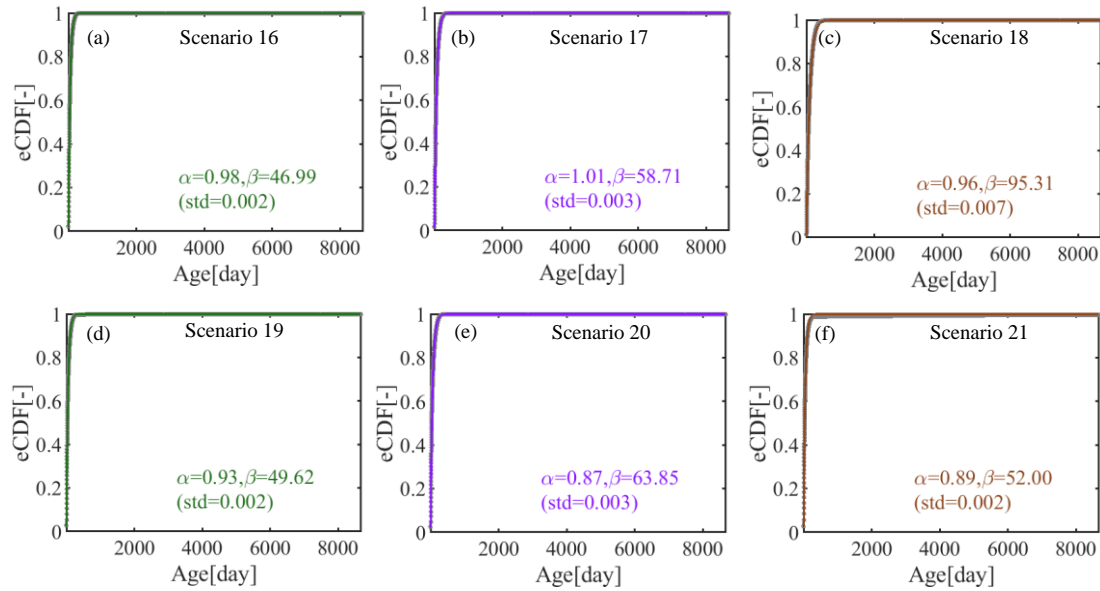

**Figure S16.** The Gamma distributions to the volume-weighted mean transpiration ( $E_a$ ) TTDs of model IM-SAS (i.e., scenarios 16-21) based on model IM-SAS-L in (a)-(c) and model IM-SAS-D in (d)-(f). Grey shades in (a)-(f) indicate volume-weighted mean TTDs and colored shades indicate the corresponding fitting Gamma distributions, respectively.

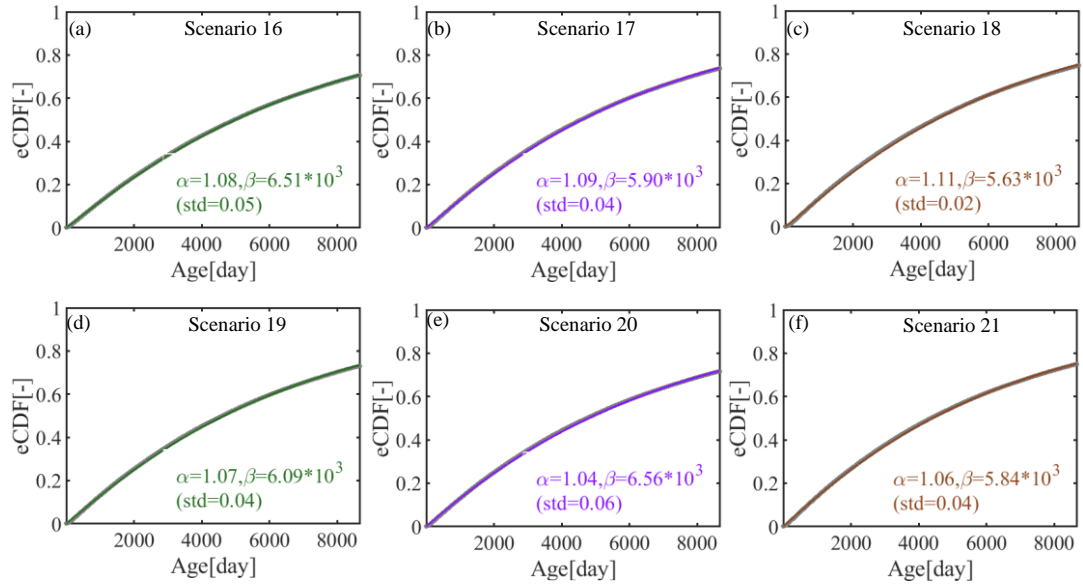

**Figure S17.** The Gamma distributions to the volume-weighted mean groundwater ( $S_v$ ) RTDs of model IM-SAS (i.e., scenarios 16-21) based on model IM-SAS-L in (a)-(c) and model IM-SAS-D in (d)-(f). Grey shades in (a)-(f) indicate volume-weighted mean RTDs and colored shades indicate the corresponding fitting Gamma distributions, respectively.

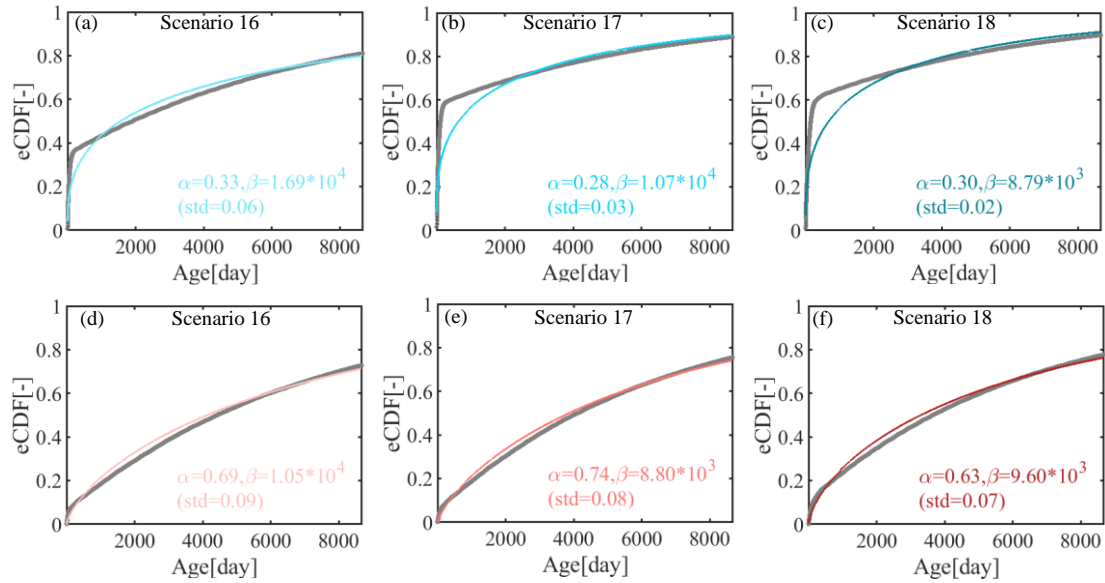

**Figure S18.** The Gamma distributions to the volume-weighted mean steam flow TTDs for the wet and dry periods of model IM-SAS-L (i.e., scenarios 16-18) based on wet periods in (a)-(c) and dry periods in (d)-(f). Grey shade and blue shades in (a)-(c) indicate volume-weighted mean TTDs for wet periods and the corresponding fitting Gamma distributions, respectively; grey shade and red shades in (d)-(f) indicate volume-weighted mean TTDs for dry periods and the corresponding fitting Gamma distributions, respectively.

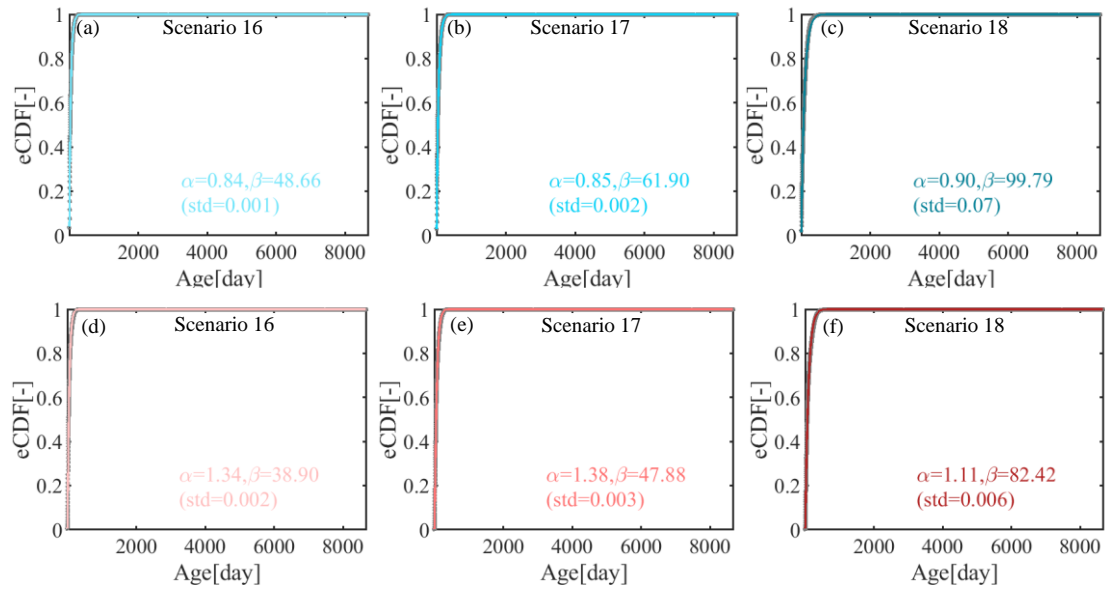

**Figure S19.** The Gamma distributions to the volume-weighted mean transpiration ( $E_a$ ) TTDs for the wet and dry periods of model IM-SAS-L (i.e., scenarios 16-18) based on wet periods in (a)-(c) and dry periods in (d)-(f). Grey shade and blue shades in (a)-(c) indicate volume-weighted mean TTDs for wet periods and the corresponding fitting Gamma distributions, respectively; grey shade and red shades in (d)-(f) indicate volume-weighted mean TTDs for dry periods and the corresponding fitting Gamma distributions, respectively.

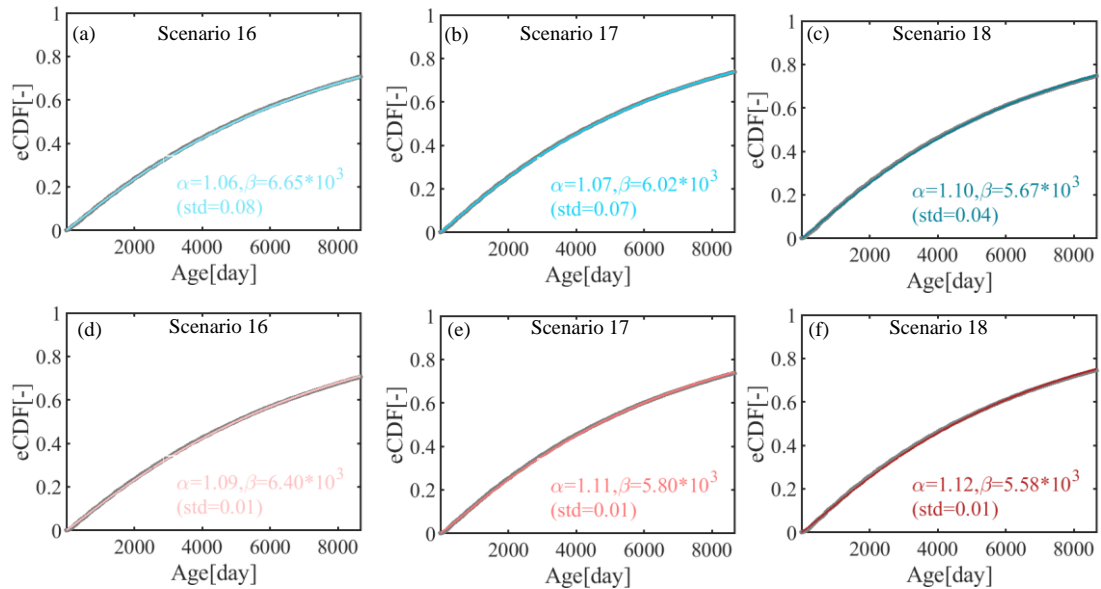

**Figure S20.** The Gamma distributions to the volume-weighted mean groundwater ( $S_a$ ) RTDs for the wet and dry periods of model IM-SAS-L (i.e., scenarios 16-18) based on wet periods in (a)-(c) and dry periods in (d)-(f). Grey shade and blue shades in (a)-(c) indicate volume-weighted mean RTDs for wet periods and the corresponding fitting Gamma distributions, respectively; grey shade and red shades in (d)-(f) indicate volume-weighted mean RTDs for dry periods and the corresponding fitting Gamma distributions, respectively.



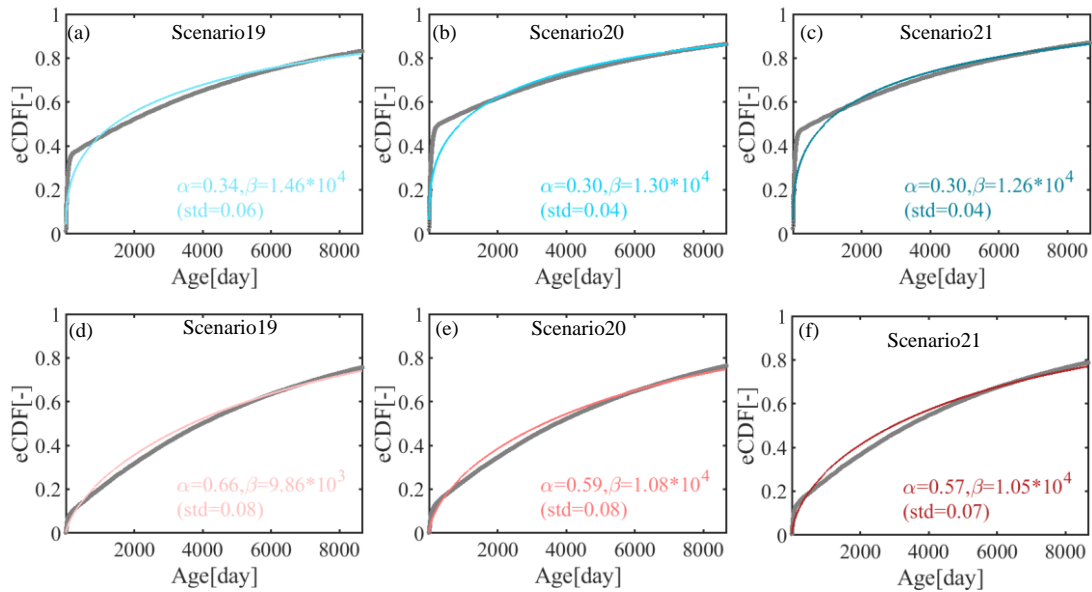

**Figure S21.** The Gamma distributions to the volume-weighted mean steam flow TTDs for the wet and dry periods of model IM-SAS-D (i.e., scenarios 19-21) based on wet periods in (a)-(c) and dry periods in (d)-(f). Grey shade and blue shades in (a)-(c) indicate volume-weighted mean TTDs for wet periods and the corresponding fitting Gamma distributions, respectively; grey shade and red shades in (d)-(f) indicate volume-weighted mean TTDs for dry periods and the corresponding fitting Gamma distributions, respectively.

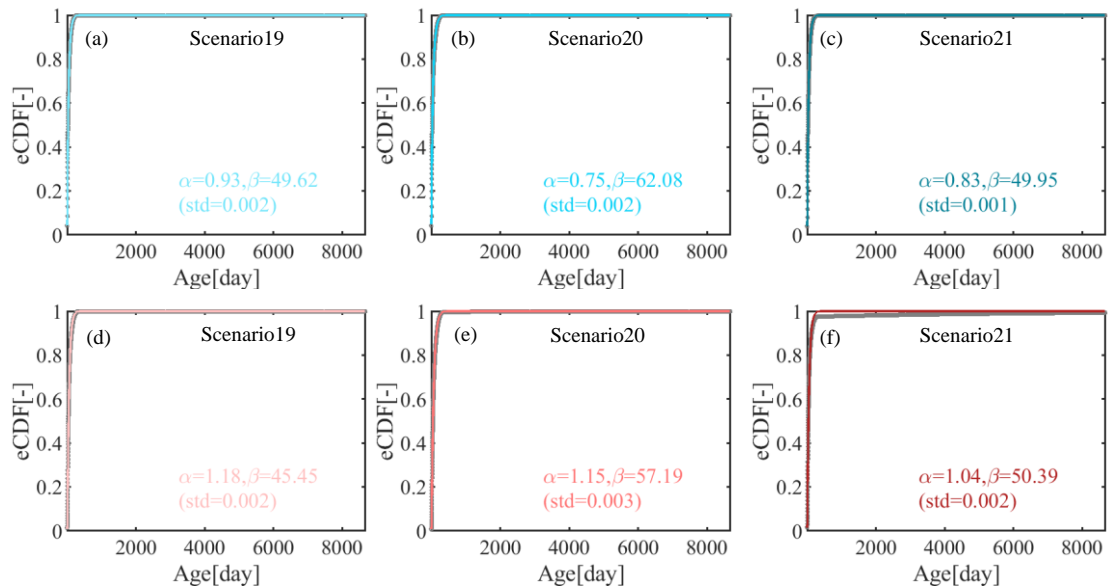

**Figure S22.** The Gamma distributions to the volume-weighted mean transpiration ( $E_a$ ) TTDs for the wet and dry periods of model IM-SAS-D (i.e., scenarios 19-21) based on wet periods in (a)-(c) and dry periods in (d)-(f). Grey shade and blue shades in (a)-(c) indicate volume-weighted mean TTDs for wet periods and the corresponding fitting Gamma distributions, respectively; grey shade and red shades in (d)-(f) indicate volume-weighted mean TTDs for dry periods and the corresponding fitting Gamma distributions, respectively.

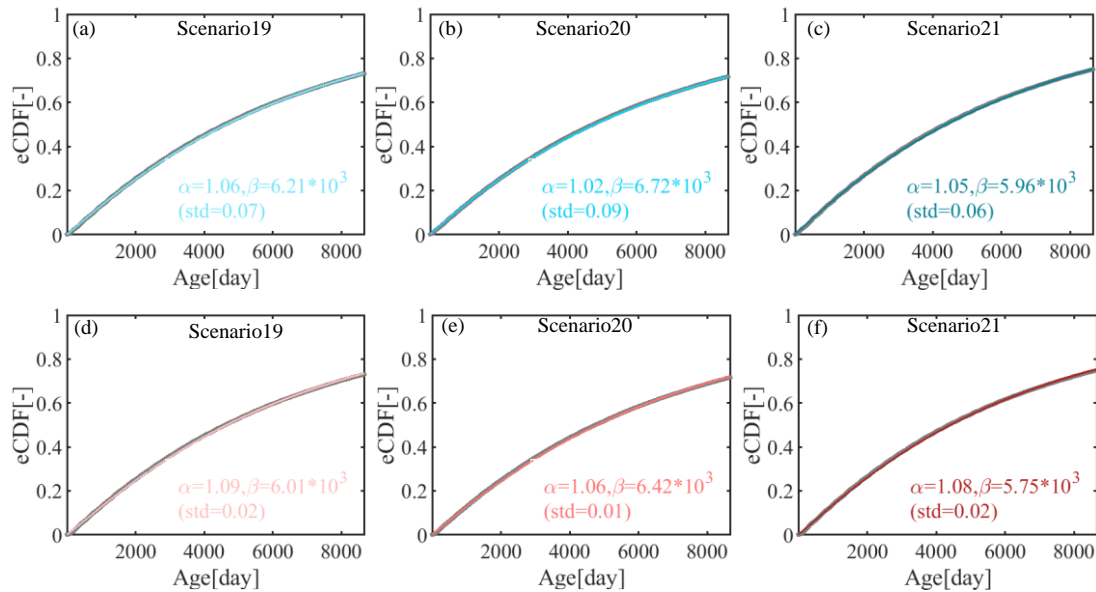

**Figure S23.** The Gamma distributions to the volume-weighted mean groundwater ( $S_g$ ) RTDs for the wet and dry periods of model IM-SAS-D (i.e., scenarios 19-21) based on wet periods in (a)-(c) and dry periods in (d)-(f). Grey shade and blue shades in (a)-(c) indicate volume-weighted mean RTDs for wet periods and the corresponding fitting Gamma distributions, respectively; grey shade and red shades in (d)-(f) indicate volume-weighted mean RTDs for dry periods and the corresponding fitting Gamma distributions, respectively.

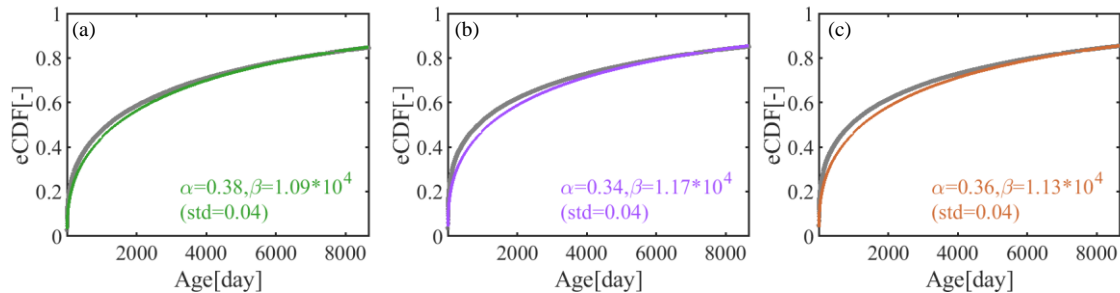

**Figure S24.** The Gamma distributions to the volume-weighted mean steam flow TTDs (i.e., scenarios 13-15). Grey shades in (a)-(c) indicate volume-weighted mean TTDs and colored shades indicate the corresponding fitting Gamma distributions (green for Scenario 13, purple for scenario 14 and brown for scenario 15), respectively.

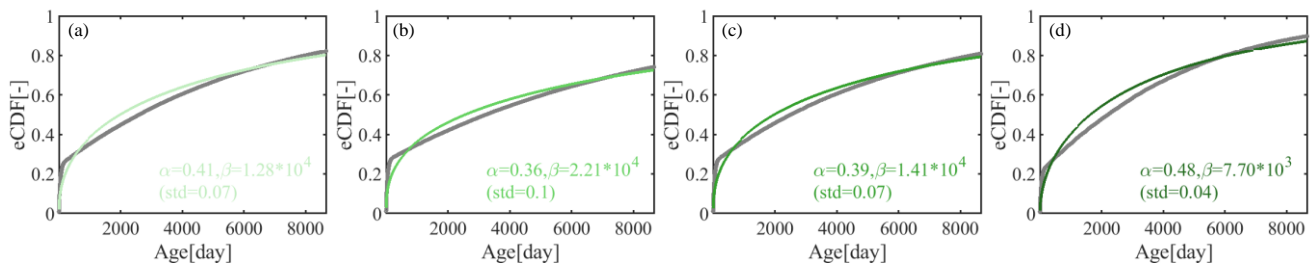

**Figure S25.** The Gamma distributions to the volume-weighted mean steam flow TTDs of each precipitation zone based on model IM-SAS-D from scenario 19. Grey shades in (a)-(d) indicate volume-weighted mean TTDs of four precipitation zones (P1-P4) and colored shades indicate the corresponding fitting Gamma distributions, respectively.

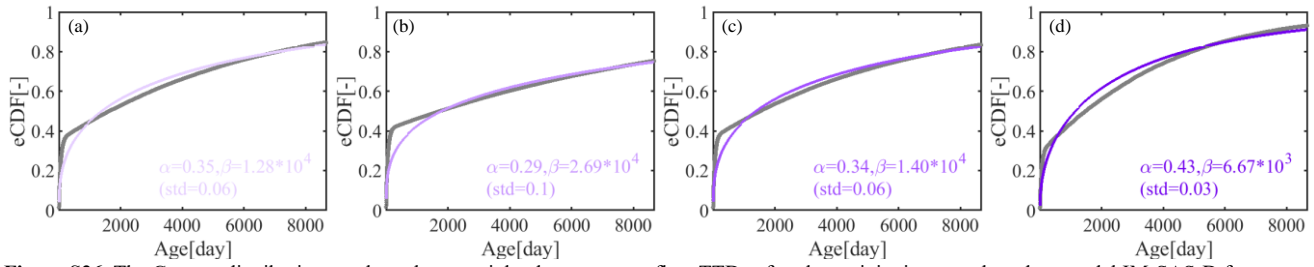

**Figure S26.** The Gamma distributions to the volume-weighted mean steam flow TTDs of each precipitation zone based on model IM-SAS-D from scenario 20. Grey shades in (a)-(d) indicate volume-weighted mean TTDs of four precipitation zones (P1-P4) and colored shades indicate the corresponding fitting Gamma distributions, respectively.

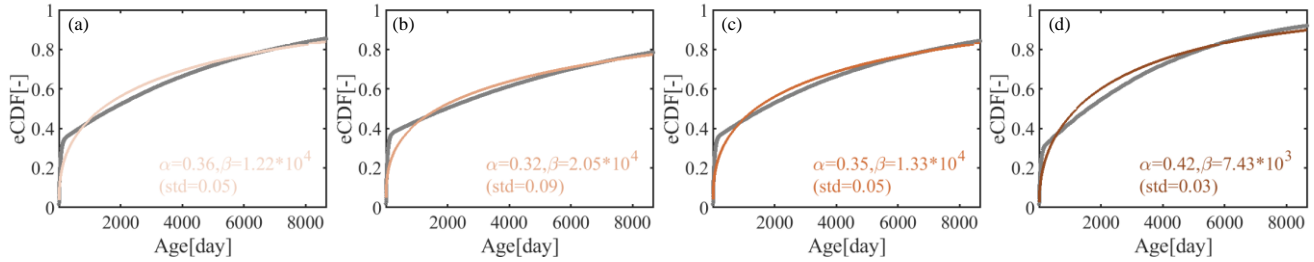

**Figure S27.** The Gamma distributions to the volume-weighted mean steam flow TTDs of each precipitation zone based on model IM-SAS-D from scenario 21. Grey shades in (a)-(d) indicate volume-weighted mean TTDs of four precipitation zones (P1-P4) and colored shades indicate the corresponding fitting Gamma distributions, respectively.

Table S3. Water balance and constitutive equations of distributed hydrological model

| Reservoirs            | Water balance                                                               | Constitutive equations                                                                          |
|-----------------------|-----------------------------------------------------------------------------|-------------------------------------------------------------------------------------------------|
| Interception          | $\frac{ds_i}{dt} = P_{rain} - E_i - P_{re} \quad (S4)$                      | $P_{rain} = P, \text{ when } T > T_t \quad (S10)$                                               |
|                       |                                                                             | $E_i = \min(E_p, S_i/dt) \quad (S11)$                                                           |
|                       |                                                                             | $P_{re} = \max((S_i - S_{imax})/dt, 0) \quad (S12)$                                             |
| Snow                  | $\frac{ds_{snow}}{dt} = P_{snow} - M_{snow} \quad (S5)$                     | $P_{snow,e} = P, \text{ when } T_e \leq T_t \quad (S13)$                                        |
|                       |                                                                             | $P_{snow} = \sum P_{snow,e} \cdot W_e \quad (S14)$                                              |
|                       |                                                                             | $M_{snow,e} = \min(C_{melt} * (T_e - T_t), S_{snow,e}/dt), \text{ when } T_e > T_t \quad (S15)$ |
|                       |                                                                             | $M_{snow} = \sum M_{snow,e} \cdot W_e \quad (S16)$                                              |
| Unsaturated reservoir | Forest/ Grass:<br>$\frac{ds_u}{dt} = P_e - E_a - R_u - R_{perc} \quad (S6)$ | $P_e = P_{re} + M_{snow} \quad (S17)$                                                           |
|                       |                                                                             | $\rho = S_u/S_{umax} \quad (S18)$                                                               |
|                       |                                                                             | $E_a = (E_p - E_i) * \min(\rho/C_a, 1) \quad (S19)$                                             |
|                       |                                                                             | $C_r = 1 - (1 - \rho)^Y \quad (S20)$                                                            |
|                       | Wetland:<br>$\frac{ds_u}{dt} = P_e - E_a - R_u + R_{cap} \quad (S7)$        | $R_u = (1 - C_r) * P_e \quad (S21)$                                                             |
|                       |                                                                             | $R_{perc} = \min(c_{pmax} * \rho, S_u/dt) \quad (S22)$                                          |
|                       |                                                                             | $R_{cap} = \min(c_{pmax} * (1 - \rho), \frac{S_s}{dt} * P_{HRU}) \quad (S23)$                   |
|                       |                                                                             | $R_{pref} = (1 - D) * R_u \quad (S24)$                                                          |
| Fast reservoir        | $\frac{ds_f}{dt} = R_f - Q_f \quad (S8)$                                    | Forest/ Grass:<br>$R_f = D * R_u \quad (S25)$                                                   |
|                       |                                                                             | Wetland:<br>$R_f = R_u \quad (S26)$                                                             |
|                       |                                                                             | $Q_f = K_f * S_f \quad (S27)$                                                                   |
| Slow reservoir        | $\frac{ds_s}{dt} = R_{perctot} + R_{preftot} - R_{captot} - Q_s \quad (S9)$ | $R_{perctot} = \sum R_{perc} \cdot P_{HRU} \quad (S28)$                                         |
|                       |                                                                             | $R_{preftot} = \sum R_{pref} \cdot P_{HRU} \quad (S29)$                                         |
|                       |                                                                             | $R_{captot} = \sum R_{cap} \cdot P_{HRU} \quad (S30)$                                           |
|                       |                                                                             | $Q_s = K_s * S_s \quad (S31)$                                                                   |

Table S4. Model parameters and their constraints in Borg\_MOEA method.

|           | Parameters  | Unit                | Description                                          | Parameter Constraints   | References                                  |
|-----------|-------------|---------------------|------------------------------------------------------|-------------------------|---------------------------------------------|
| Global    | $T_t$       | °C                  | Threshold temperature to split snowfall and rainfall |                         | (Gao et al., 2014; Hrachowitz et al., 2013) |
|           | $C_{melt}$  | mm °C <sup>-1</sup> | Melt factor                                          |                         | (Prenner et al., 2018)                      |
|           | $C_a$       | -                   | Evapotranspiration coefficient                       |                         | (Gao et al., 2017)                          |
|           | $K_s$       | d <sup>-1</sup>     | Recession coefficient of slow response reservoir     |                         | (Prenner et al., 2018)                      |
|           | Ssp         | mm                  | Passive storage Volume                               |                         | (Hrachowitz et al., 2021)                   |
| Forest    | $S_{imaxF}$ | mm                  | Interception capacity                                | $S_{imaxF} > S_{imaxG}$ | (Gao et al., 2014)                          |
|           | $S_{umaxF}$ | mm                  | Root zone storage capacity                           | $S_{umaxF} > S_{umaxG}$ | (Gao et al., 2014)                          |
|           | $Y_F$       | -                   | Shape parameter                                      |                         | (Gao et al., 2014)                          |
|           | $D$         | -                   | Splitter to fast and slow response reservoirs        |                         | (Gao et al., 2014)                          |
|           | $c_{pmaxF}$ | mm d <sup>-1</sup>  | Percolation capacity                                 |                         | (Prenner et al., 2018)                      |
|           | $K_{fF}$    | d <sup>-1</sup>     | Recession coefficient of fast response reservoir     | $K_{fF} > K_s$          | (Hrachowitz et al., 2013)                   |
| Grassland | $S_{imaxG}$ | mm                  | Interception capacity                                |                         | (Gao et al., 2014)                          |
|           | $S_{umaxG}$ | mm                  | Root zone storage capacity                           | $S_{umaxG} > S_{umaxW}$ | (Gao et al., 2014)                          |
|           | $Y_G$       | -                   | Shape parameter                                      |                         | (Gao et al., 2014)                          |
|           | $c_{pmaxG}$ | mm d <sup>-1</sup>  | Percolation capacity                                 |                         | (Prenner et al., 2018)                      |
|           | $K_{fG}$    | d <sup>-1</sup>     | Recession coefficient of fast response reservoir     | $K_{fG} > K_s$          | (Hrachowitz et al., 2013)                   |
| Wetland   | $S_{umaxW}$ | mm                  | Root zone storage capacity                           | $S_{umaxW} < S_{umaxG}$ | (Gao et al., 2014)                          |
|           | $Y_W$       | -                   | Shape parameter                                      |                         | (Gao et al., 2014)                          |
|           | $c_{rmax}$  | mm d <sup>-1</sup>  | Percolation capacity                                 |                         | (Gao et al., 2014)                          |
|           | $K_{fW}$    | d <sup>-1</sup>     | Recession coefficient of fast response reservoir     | $K_{fW} > K_s$          | (Prenner et al., 2018)                      |

Table S5. Performance metrics of the model implementations and the associated calibration strategies for the 2001 – 2009 calibration period (cal.) and the 2010 – 2016 model evaluation period (val.). The ranges of all performance metrics for the full set of pareto optimal solutions for the multi-objective calibration cases (Scenarios 15 – 21) are shown here.

| Scenario               |                      | 15                       | 16                       | 17           | 18                          | 19                       | 20           | 21                          |
|------------------------|----------------------|--------------------------|--------------------------|--------------|-----------------------------|--------------------------|--------------|-----------------------------|
| Model                  |                      | P-SAS                    | IM-SAS-L                 |              |                             | IM-SAS-D                 |              |                             |
| Implementation         |                      | Lumped                   |                          |              | Distributed                 |                          |              |                             |
| Calibration strategy → |                      | $C_{\delta}^{18}_{O, H}$ | $C_{\delta}^{18}_{O, Q}$ | $C^3_{H, Q}$ | $C_{\delta}^{18}_{O, H, Q}$ | $C_{\delta}^{18}_{O, Q}$ | $C^3_{H, Q}$ | $C_{\delta}^{18}_{O, H, Q}$ |
| Performance metric ↓   |                      |                          |                          |              |                             |                          |              |                             |
| Performance metrics    | $MSE_{\delta^{18}O}$ | cal. 0.069-0.080         | 0.070-0.347              | -            | 0.068-0.756                 | 0.068-0.188              | -            | 0.068-0.262                 |
|                        |                      | val. 0.212-0.216         | 0.134-0.733              | -            | 0.116-1.006                 | 0.129-0.648              | -            | 0.141-0.905                 |
|                        | $MSE_{\delta^3H}$    | cal. 2.846-2.869         | -                        | 2.972-71.69  | 2.823-130.6                 | -                        | 2.956-19.75  | 2.975-47.54                 |
|                        |                      | val. 1.704-1.758         | -                        | 1.825-19.97  | 1.908-40.46                 | -                        | 1.932-4.883  | 1.915-13.29                 |
|                        | $MSE_Q$              | cal. -                   | 0.194-1.287              | 0.193-0.703  | 0.196-2.762                 | 0.228-0.817              | 0.232-0.442  | 0.248-1.161                 |
|                        |                      | val. -                   | 0.211-1.239              | 0.212-0.706  | 0.215-2.572                 | 0.251-0.827              | 0.253-0.454  | 0.273-1.118                 |
|                        | $MSE_{log(Q)}$       | cal. -                   | 0.090-0.584              | 0.091-0.304  | 0.098-0.621                 | 0.119-0.334              | 0.101-0.231  | 0.112-0.399                 |
|                        |                      | val. -                   | 0.088-0.662              | 0.080-0.362  | 0.083-0.582                 | 0.101-0.321              | 0.088-0.310  | 0.105-0.485                 |
|                        | $MSE_{FDC_Q}$        | cal. -                   | 0.003-0.359              | 0.003-0.129  | 0.003-1.042                 | 0.002-0.144              | 0.002-0.072  | 0.002-0.212                 |
|                        |                      | val. -                   | 0.004-0.369              | 0.002-0.195  | 0.007-0.877                 | 0.003-0.141              | 0.012-0.111  | 0.004-0.180                 |
|                        | $MSE_{FDC_{log(Q)}}$ | cal. -                   | 0.001-0.173              | 0.002-0.126  | 0.002-0.377                 | 0.002-0.119              | 0.002-0.051  | 0.002-0.167                 |
|                        |                      | val. -                   | 0.003-0.229              | 0.002-0.207  | 0.003-0.345                 | 0.002-0.093              | 0.004-0.127  | 0.003-0.251                 |
|                        | $MSE_{RC}$           | cal. -                   | 0.003-0.045              | 0.003-0.011  | 0.003-0.070                 | 0.003-0.018              | 0.002-0.006  | 0.002-0.026                 |
|                        |                      | val. -                   | 0.003-0.040              | 0.002-0.011  | 0.002-0.064                 | 0.002-0.016              | 0.002-0.008  | 0.002-0.023                 |
|                        | $MSE_{AC_Q}$         | cal. -                   | 0.000-0.030              | 0.000-0.019  | 0.000-0.034                 | 0.000-0.013              | 0.000-0.016  | 0.000-0.019                 |
|                        |                      | val. -                   | 0.000-0.034              | 0.000-0.026  | 0.000-0.045                 | 0.000-0.027              | 0.000-0.019  | 0.000-0.031                 |

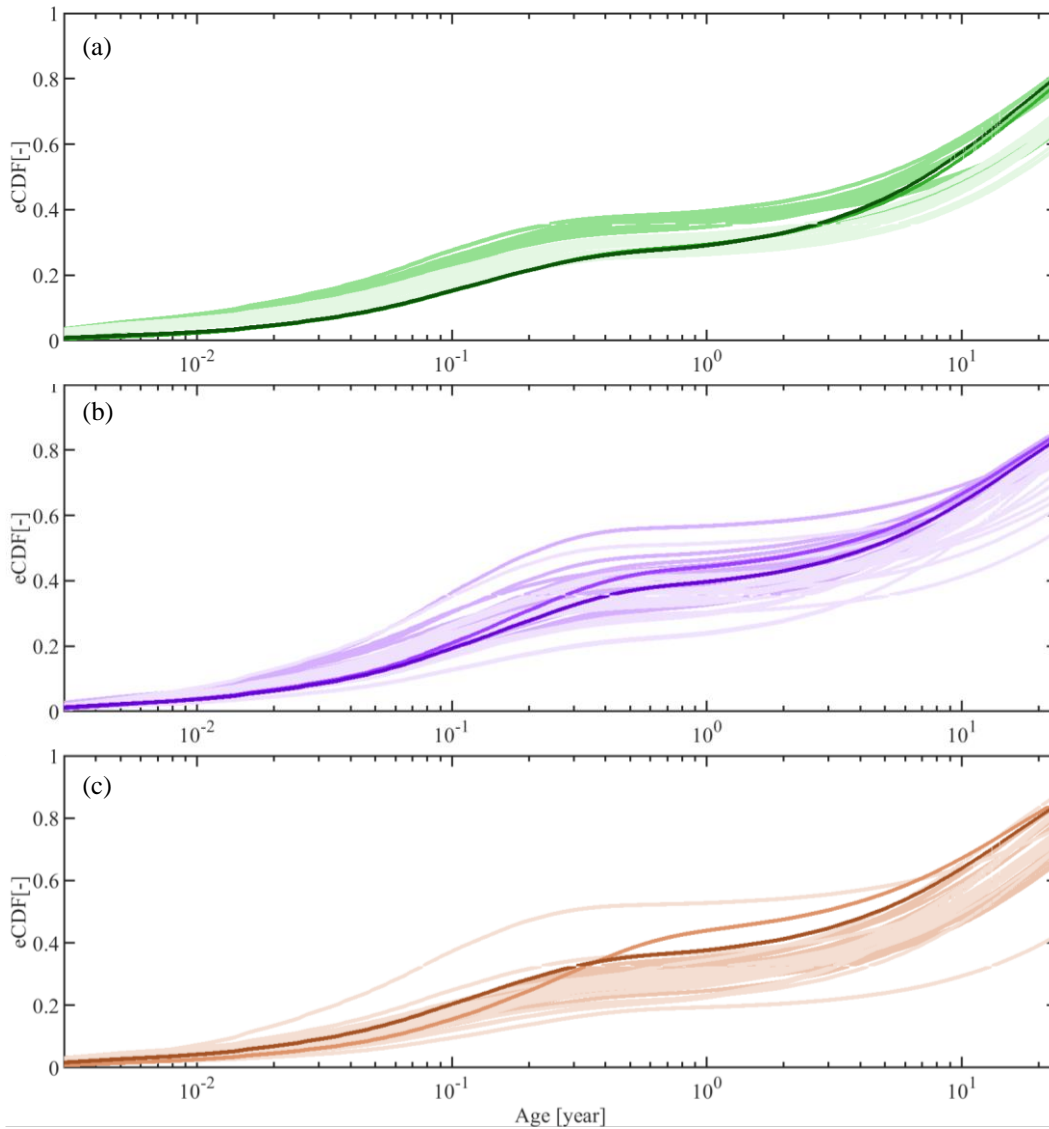

**Figure S28.** Stream flow TTDs derived from the 6 model scenarios based on IM-SAS models with the different associated calibration strategies (scenarios 16-21). The selected volume weighted average daily TTDs during the modelling period 01/10/2001 – 31/12/2016 are given. (a) The TTDs inferred from  $\delta^{18}\text{O}$ ; the lightest green lines represent the TTDs based on selected solutions with scenario 16; the relatively lighter green lines represent the TTDs based on selected solutions with scenario 19; the green line represents the TTDs based on best-fit solution with scenario 16; the dark green line represents the TTDs based on best-fit solution with scenario 19; (b) The TTDs inferred from  $^3\text{H}$ ; the lightest purple lines represent the TTDs based on selected solutions with scenario 17; the relatively lighter purple lines represent the TTDs based on selected solutions with scenario 20; the purple line represents the TTDs based on best-fit solution with scenario 17; the dark purple line represents the TTDs based on best-fit solution with scenario 20; (c) The TTDs inferred from combined  $\delta^{18}\text{O}$  and  $^3\text{H}$ ; the lightest brown lines represent the TTDs based on selected solutions with scenario 18; the relatively lighter brown lines represent the TTDs based on selected solutions with scenario 21; the brown line represents the TTDs based on best-fit solution with scenario 18; the dark brown line represents the TTDs based on best-fit solution with scenario 21.

**Table S6.** Metrics of stream flow TTDs for four precipitation zones (P1-P4) derived from the IM-SAS-D model with the different associated calibration strategies, where  $C_{\delta^{18}\text{O}}$  indicates calibration to  $\delta^{18}\text{O}$ ,  $C^3\text{H}$  calibration to  $^3\text{H}$ , while  $C_{\delta^{18}\text{O},\text{O}_2}$ ,  $C^3\text{H},\text{O}_2$  and  $C_{\delta^{18}\text{O},^3\text{H},\text{O}_2}$  indicate multi-objective, i.e. simultaneous calibration to combinations of  $\delta^{18}\text{O}$ ,  $^3\text{H}$  and stream flow. The TTD metrics represent the mean and standard deviations of all daily streamflow TTDs during the modelling period 01/10/2001 – 31/12/2016 are given. The mean transit time for each precipitation zone was estimated by fitting Gamma distributions to the volume-weighted mean TTDs. The water fractions are shown as the fractions of below a specific age T. \*Note that the fraction of water younger than 3 months is comparable to the fraction of young water as suggested by Kirchner (2016) and the long term-mean precipitation for P1-P4:  $\text{P2} < \text{P3} < \text{P1} < \text{P4}$ .

| Scenario                              |                           | 19                                   |          |          |          | 20                       |          |          |          | 21                                              |          |          |          |
|---------------------------------------|---------------------------|--------------------------------------|----------|----------|----------|--------------------------|----------|----------|----------|-------------------------------------------------|----------|----------|----------|
| Calibration strategy                  |                           | $C_{\delta^{18}\text{O},\text{O}_2}$ |          |          |          | $C^3\text{H},\text{O}_2$ |          |          |          | $C_{\delta^{18}\text{O},^3\text{H},\text{O}_2}$ |          |          |          |
| Precipitation zone →<br>TTD metrics ↓ |                           | P1                                   | P2       | P3       | P4       | P1                       | P2       | P3       | P4       | P1                                              | P2       | P3       | P4       |
| Percentiles<br>(yr)                   | Mean (yr)                 | 14.5                                 | 21.9     | 15.3     | 10.2     | 12.3                     | 21.4     | 13.0     | 7.9      | 12.0                                            | 17.7     | 12.6     | 8.6      |
|                                       | 10 <sup>th</sup>          | 0.3±0.5                              | 0.4±0.6  | 0.3±0.5  | 0.4±0.5  | 0.3±0.5                  | 0.4±0.7  | 0.3±0.5  | 0.3±0.4  | 0.3±0.4                                         | 0.3±0.5  | 0.3±0.4  | 0.3±0.4  |
|                                       | 25 <sup>th</sup>          | 2.1±1.6                              | 2.5±2.2  | 2.1±1.6  | 2.2±1.2  | 1.5±1.7                  | 2.0±2.6  | 1.5±1.7  | 1.4±1.2  | 1.5±1.5                                         | 1.7±2.0  | 1.5±1.5  | 1.6±1.3  |
|                                       | 50 <sup>th</sup> (median) | 8.4±2.4                              | 10.5±3.7 | 8.5±2.6  | 7.2±1.7  | 6.7±3.6                  | 9.3±6.1  | 6.7±3.7  | 5.4±2.1  | 6.5±3.4                                         | 8.1±4.7  | 6.5±3.4  | 5.7±2.5  |
|                                       | 75 <sup>th</sup>          | 19.6±2.5                             | 25.8±3.7 | 20.6±2.8 | 15.1±1.7 | 17.1±4.0                 | 25.4±6.8 | 18.6±4.5 | 12.4±2.2 | 17.0±3.8                                        | 22.3±5.7 | 17.6±4.2 | 13.2±2.6 |
| 90 <sup>th</sup>                      | 30.6±3.8                  | 31.4±4.4                             | 31.0±4.2 | 25.0±1.9 | 29.7±4.0 | 31.3±4.4                 | 30.2±4.2 | 21.3±2.2 | 29.0±3.8 | 31.1±4.4                                        | 29.7±4.1 | 22.6±2.6 |          |
| Water fractions<br>(%)                | F(T<3 m)*                 | 15±9                                 | 17±11    | 16±10    | 12±8     | 20±12                    | 22±15    | 20±13    | 16±11    | 21±14                                           | 23±15    | 21±15    | 17±13    |
|                                       | F(T<6 m)                  | 19±11                                | 21±12    | 20±11    | 15±9     | 26±15                    | 29±18    | 27±16    | 22±13    | 26±16                                           | 28±17    | 27±16    | 22±15    |
|                                       | F(T<1 yr)                 | 22±11                                | 23±12    | 22±11    | 19±9     | 30±16                    | 32±18    | 30±16    | 26±13    | 29±15                                           | 30±17    | 29±16    | 25±14    |
|                                       | F(T<3 yr)                 | 30±10                                | 29±11    | 31±10    | 30±8     | 37±14                    | 36±17    | 37±14    | 37±11    | 37±14                                           | 36±15    | 37±14    | 36±12    |
|                                       | F(T<5 yr)                 | 38±9                                 | 35±10    | 38±9     | 40±7     | 44±12                    | 41±15    | 44±13    | 48±10    | 44±12                                           | 42±14    | 45±12    | 46±11    |
|                                       | F(T<10 yr)                | 54±7                                 | 48±8     | 54±7     | 60±6     | 59±9                     | 51±13    | 58±10    | 67±7     | 60±9                                            | 54±11    | 59±9     | 65±7     |
|                                       | F(T<20 yr)                | 75±3                                 | 66±5     | 74±4     | 84±2     | 78±5                     | 66±9     | 76±5     | 88±2     | 79±5                                            | 71±7     | 78±5     | 87±3     |

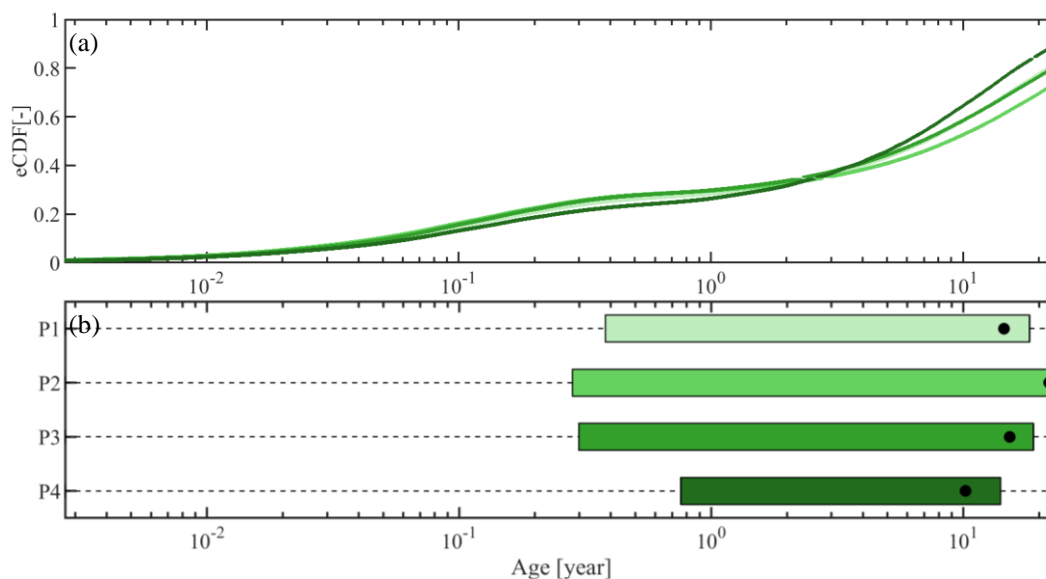

**Figure S29.** Stream flow weighted-TTDs of four precipitation zones (P1-P4) derived from model scenario 19. Different green shades from light to dark represent the TTDs for P1 to P4 in (a) and (b); the black dots in (b) indicate the mean transit time for each precipitation zone. Note that the mean transit time was estimated by fitting Gamma distributions to the volume-weighted mean TTDs of each individual precipitation zone and the long term-mean precipitation for four precipitation zones P1-P4:  $\text{P2} < \text{P3} < \text{P1} < \text{P4}$ .

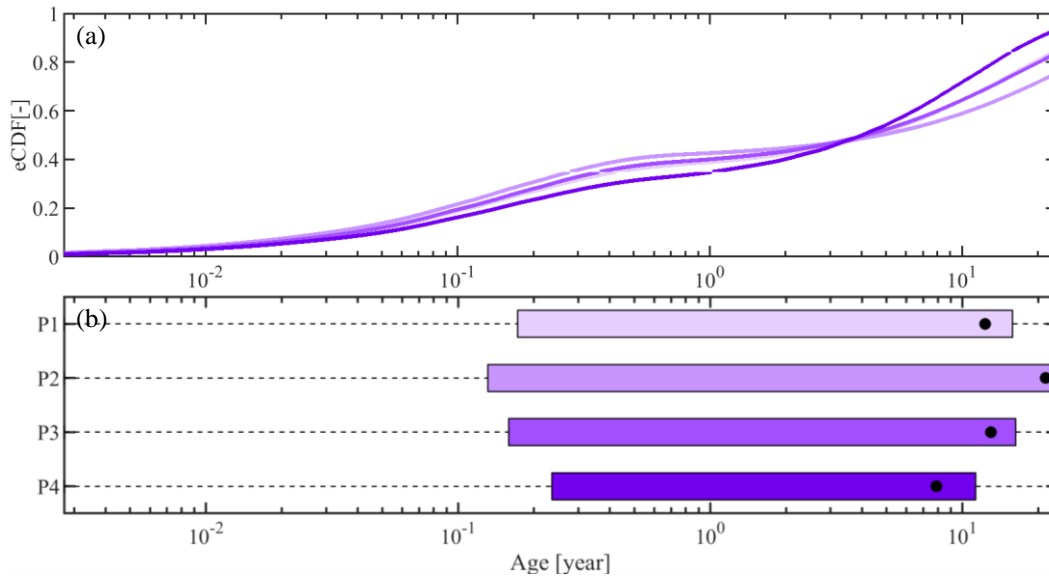

**Figure S30.** Stream flow weighted-TTDs of four precipitation zones (P1-P4) derived from model scenario20. Different purple shades from light to dark represent the TTDs for P1 to P4 in (a) and (b); the black dots in (b) indicate the mean transit time for each precipitation zone. Note that the mean transit time was estimated by fitting Gamma distributions to the volume-weighted mean TTDs of each individual precipitation zone and the long term-mean precipitation for four precipitation zones P1-P4:  $P2 < P3 < P1 < P4$ .

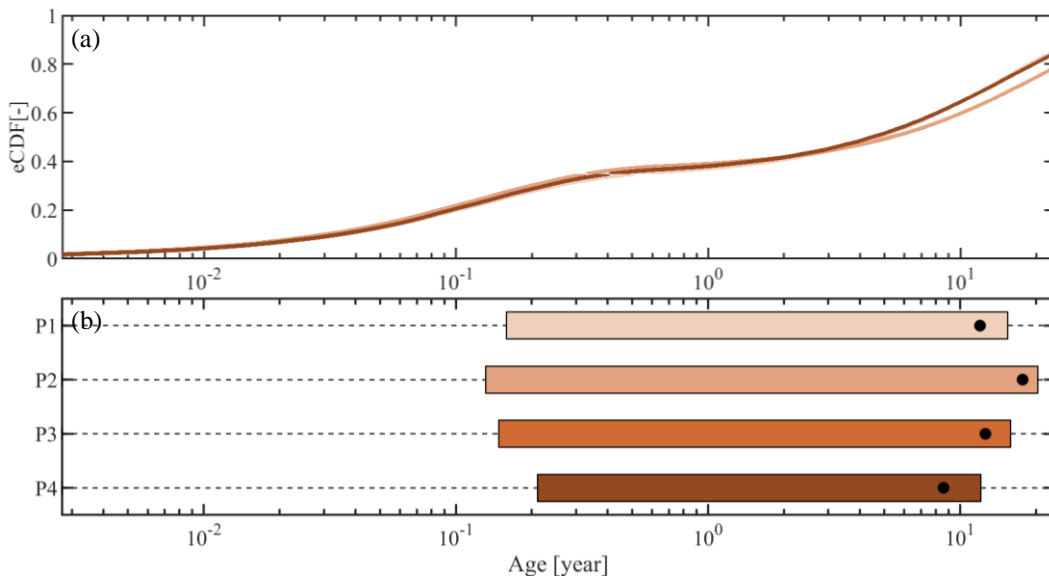

**Figure S31.** Stream flow weighted-TTDs of four precipitation zones (P1-P4) derived from model scenario21. Different brown shades from light to dark represent the TTDs for P1 to P4 in (a) and (b); the black dots in (b) indicate the mean transit time for each precipitation zone. Note that the mean transit time was estimated by fitting Gamma distributions to the volume-weighted mean TTDs of each individual precipitation zone and the long term-mean precipitation for four precipitation zones P1-P4:  $P2 < P3 < P1 < P4$ .



## References

- Gao, H., Ding, Y., Zhao, Q., Hrachowitz, M., and Savenije, H. H.: The importance of aspect for modelling the hydrological response in a glacier catchment in Central Asia, *Hydrol. Process.*, 31, 2842-2859, <https://doi.org/10.1002/hyp.11224>, 2017.
- Gao, H., Hrachowitz, M., Fenicia, F., Gharari, S., and Savenije, H.: Testing the realism of a topography-driven model (FLEX-Topo) in the nested catchments of the Upper Heihe, China, *Hydrol. Earth Syst. Sci.*, 18, 1895-1915, <https://doi.org/10.5194/hess-18-1895-2014>, 2014.
- Hrachowitz, M., Savenije, H., Bogaard, T., Tetzlaff, D., and Soulsby, C.: What can flux tracking teach us about water age distribution patterns and their temporal dynamics?, *Hydrol. Earth Syst. Sci.*, 17, 533-564, <https://doi.org/10.5194/hess-17-533-2013>, 2013.
- Hrachowitz, M., Stockinger, M., Coenders-Gerrits, M., van der Ent, R., Bogena, H., Lücke, A., and Stumpp, C.: Reduction of vegetation-accessible water storage capacity after deforestation affects catchment travel time distributions and increases young water fractions in a headwater catchment, *Hydrol. Earth Syst. Sci.*, 25, 4887-4915, <https://doi.org/10.5194/hess-25-4887-2021>, 2021.
- Prenner, D., Kaitna, R., Mostbauer, K., and Hrachowitz, M.: The value of using multiple hydrometeorological variables to predict temporal debris flow susceptibility in an alpine environment, *Water Resour. Res.*, 54, 6822-6843, <https://doi.org/10.1029/2018WR022985>, 2018.
